# Supplementary material
Source: PubMed Central journal article supplement (PMC5100769)
Supplement: supp_pp.16.01269_PP2016-01269DR1_Supplemental_Material.pdf [file supp_pp.16.01269_PP2016-01269DR1_Supplemental_Material.pdf]

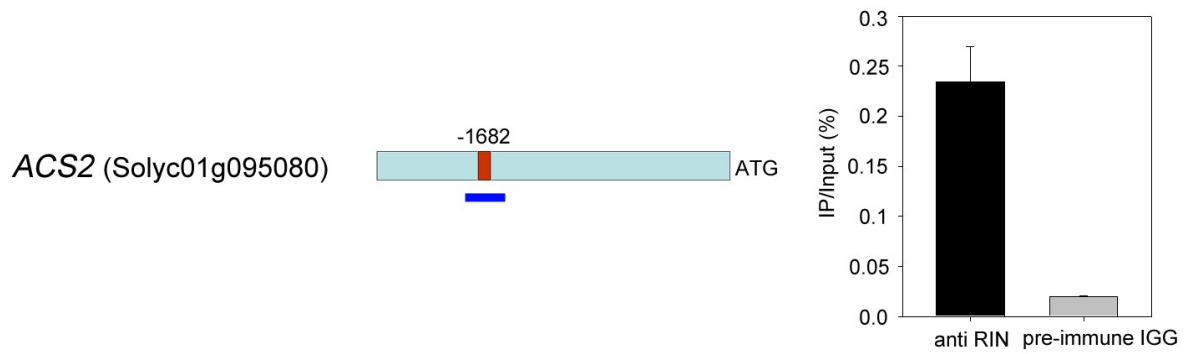

**Supplemental Figure S1.** The binding ability of RIN to the promoter of *ACS2* as revealed by chromatin immunoprecipitation. The promoter region of *ACS2* is indicated. Red box represents CArG box element and number above the box indicates the position of this motif relative to the translational start site. The blue fragment represents the region used for ChIP-qPCR. The value is percentage of DNA fragment that was co-immunoprecipitated with specific anti-RIN antibody or non-specific antibody (preimmune rabbit IgG) relative to the input DNA. Error bars represent the SD of three independent experiments.

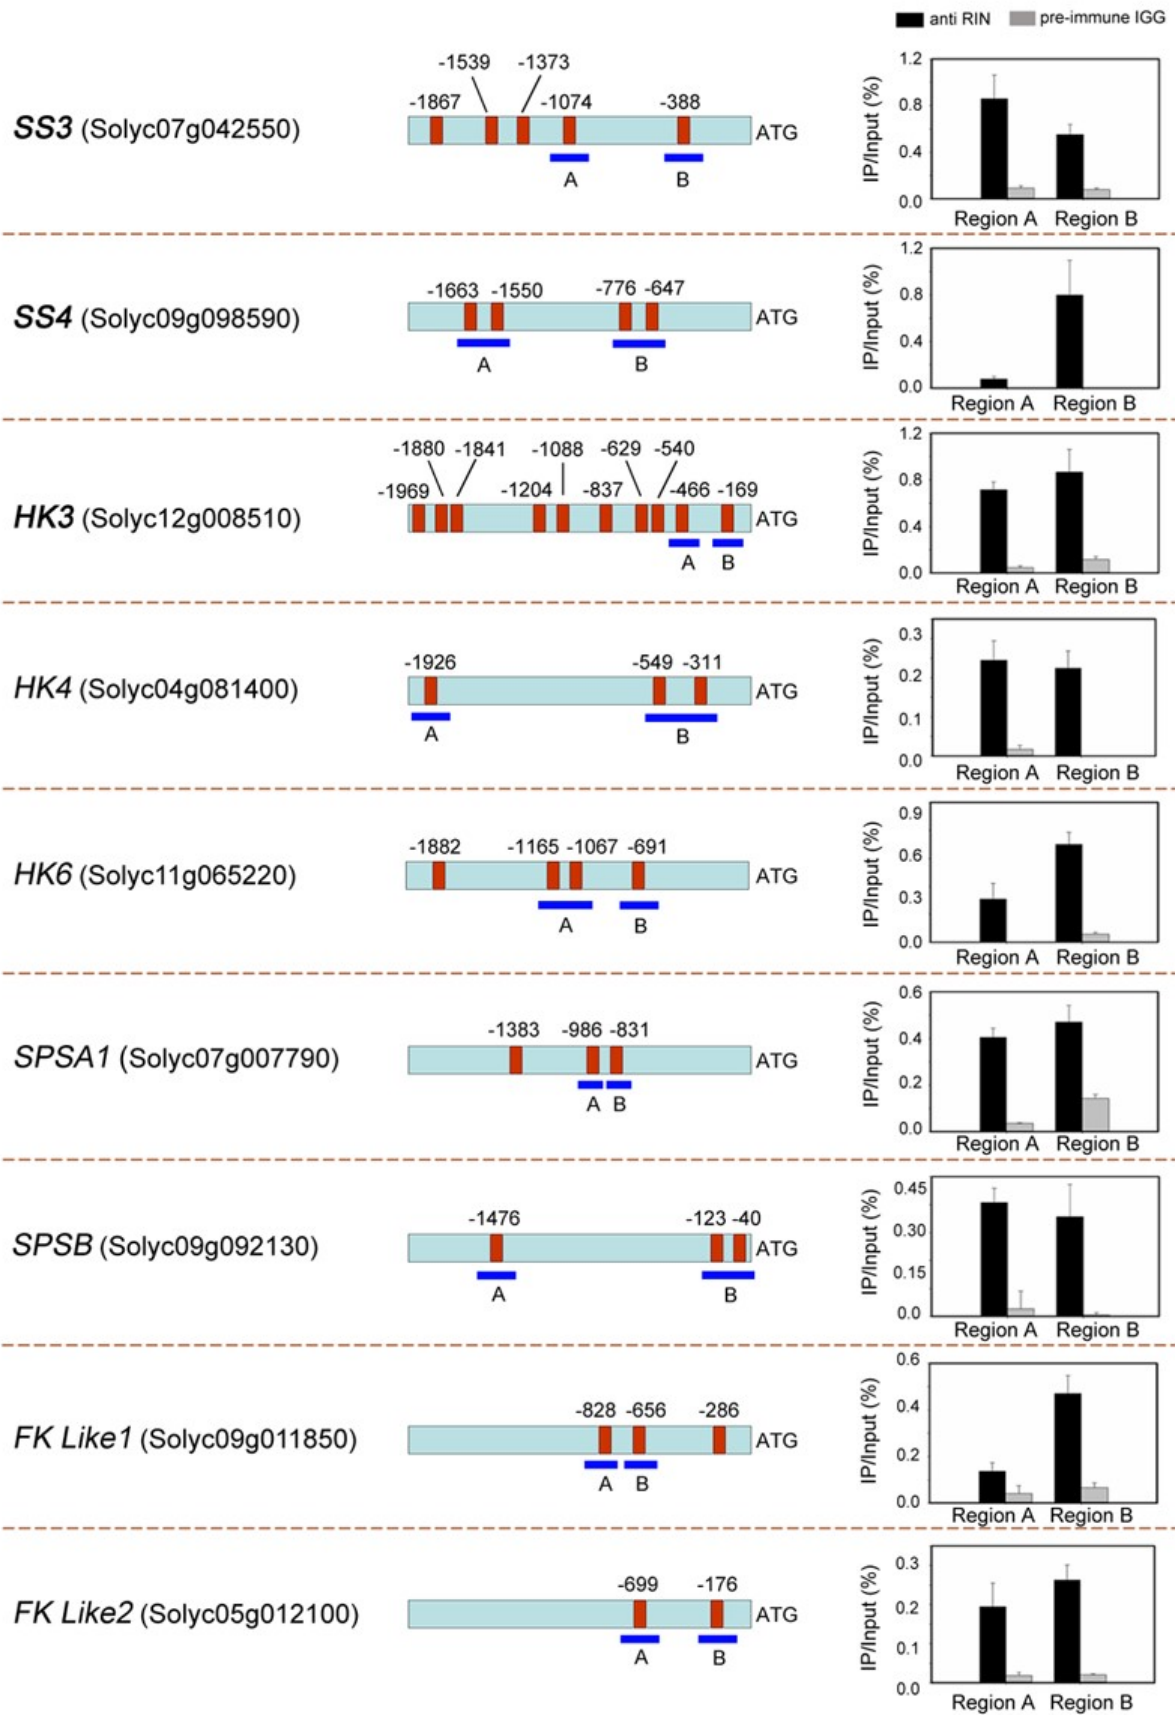

**Supplemental Figure S2.** Chromatin immunoprecipitation reveals the direct binding of RIN to the promoters of genes involved in sucrose metabolism. The promoter regions of the target

genes are indicated. Red boxes represent CARG box elements and numbers above the box indicate the position of these motifs relative to the translational start site. The blue fragments with upper-case letters represent the regions used for CHIP-qPCR. Values are the percentage of DNA fragments that were co-immunoprecipitated with specific anti-RIN antibodies or non-specific antibodies (preimmune rabbit IgG) relative to the input DNA. Error bars represent the SD of three independent experiments. SS, sucrose synthase; HK, hexokinase; SPS, sucrose phosphate synthase; FK, fructokinase.

```

SIVIF 1 MRNLFPIIMLLITNLALNNDNNNNNNNLYLIHATCRETFPYYSLCLITLQSDPRSNEVEGDD
SIVIF 1 MRNLFPIIMLLITNLSLHIDNNNNNN--NIIRATCRETFPYYSLCLSVLES DPRSYKAEGSD
NIVIF 1 MRNLFPIIFMLITNLAFN-DNNNSN---NIINTTCRATTNYPLCLITLHSDPRTSEAEAD
SICIF 1 MKILIFLIMFLAMLLVT--SGNNN----LVETTCKNTPNYNLCVKTLSDLKRSE---KAG
StCIF 1 MKIFIFLMMFLAMLLVT--NGNNN----LVETTCKNTPNYNLCVKTLSDLKRSE---TAG
NtCIF 1 MKNLIIFLTMFLTILLQT--NANN----LVETTCKNTPNYQLCLKTLSDLKRSE----ATG

SIVIF 61 AITTLGLIMVDAVKSKSIEIMEKIKELKESNP--EWRAPLSQCYVAYNAVLRADVTVAVE
SIVIF 58 DITTLGLIMVDAVKSKSIEIMKKLKELEKSNP--EWRVPLNQCVMVYNTVLRADVTVAVE
NIVIF 57 -LITTLGLVMVDAVKLKSIEIMKSIKKLEKSNP--ELRLPLSQCYIVYYAVLHADVTVAVE
SICIF 52 DITTLALIMVDAIKSKANQAANTISKLRHSNPPQAWKDPLENCAFSYKVIILPASMPEALE
StCIF 52 DITTLALIMVDAIKSKANQAANTISKLRHSNPPQAWKDPLENCAFSYKVIILTASMPAIE
NtCIF 50 DITTLALIMVDAIKAKANQAAVTISKLRHSNPPAAWKGPLENCAFSYKVIILTASLPEALE

SIVIF 119 ALKKGVPKFAEDGMDDVVVEAQTCEYSFNYYNKLDFFISNLSREIIELSKVAKSIIRMLL
SIVIF 116 ALKRGVPKFAEDGMDDVVVEAQTCEFSFNYYNKSDFFISNMSKDIVELSKVAKSIIRMLL
NIVIF 114 ALKRGVPKFAENGMVDVAVEAETCEFSFK-YNGLVSPVSDMKEIIELSKVAKSIIRMLL
SICIF 112 ALTKGDPKFAEDGMVGS S GDAQEC E E Y F K A T T I K Y S P L S K L N I D V H E L S D V G R A I V R N L L
StCIF 112 ALTKGDPKFAEDGMVGS S GDAQEC E E Y F K A I T I K Y S P L S K L N I D V H E L S D V G R A I V R N L L
NtCIF 110 ALTKGDPKFAEDGMVGS S GDAQEC E E Y F K G S ---KSPFSA L N I A V H E L S D V G R A I V R N L L

```

**Supplemental Figure S3.** Alignment of amino acid sequences of invertase inhibitors from various plants. The sequences of invertase inhibitors are taken from tomato (SICIF), tobacco (NtVIF and NtCIF) and potato (StVIF and StCIF). Four conserved Cys residues are boxed.

**Supplemental Table S1.** *Genes involved in sucrose metabolism*

| Family    | Name        | ITAG gene locus | Genbank accession numbers | CAR <sub>G</sub> box                                                                                | Motif number |
|-----------|-------------|-----------------|---------------------------|-----------------------------------------------------------------------------------------------------|--------------|
| Invertase | <i>LIN5</i> | Solyc09g010080  | NM_001247864              | -269: CATAAAAATG<br>-482: CTATTTATTG<br>-1931: CAAAAAAATG<br>-1982: CATATTTATG                      | 4            |
|           | <i>LIN6</i> | Solyc10g083290  | AF506005                  | —                                                                                                   | 0            |
|           | <i>LIN7</i> | Solyc09g010090  | NM_001247772              | -1266: CTAATATTTG<br>-1603: CATTATTTG                                                               | 2            |
|           | <i>LIN8</i> | Solyc10g083300  | XM_004249387              | -250: CATATTAATG<br>-690: CAAAATTTTG<br>-1286: CAAAATTTTG<br>-1388: CAAATTTAAG<br>-1765: CAAAATAATG | 5            |
|           | <i>LIN9</i> | Solyc08g079080  | NM_001247140              | -153: CTTAAAAAAG<br>-379: CAAAATTAAG<br>-412: CAATAATTAG                                            | 7            |

---

|             |                |              |                    |   |
|-------------|----------------|--------------|--------------------|---|
|             |                |              | -464: CTATTTAAAG   |   |
|             |                |              | -736: CAATATTTAG   |   |
|             |                |              | -822: CAATTTTATG   |   |
|             |                |              | -1427: CTAAATTAAG  |   |
| <i>VI</i>   | Solyc03g083910 | D11350       | -1094: CTATAAATAG  | 2 |
|             |                |              | -1824: CTAAAAATAG  |   |
| <i>NI1*</i> | Solyc01g058010 | XR_182330    | -610: CAATTTTAAG   | 4 |
|             |                |              | -686: CATATTTATG   |   |
|             |                |              | -993: CCATTAATGG   |   |
|             |                |              | -1095: CATTTTATTG  |   |
| <i>NI2*</i> | Solyc01g100810 | XM_004230281 | -33: CATATATTTG    | 4 |
|             |                |              | -1015: CATATATTTG  |   |
|             |                |              | -1417: CTAAATTAAG  |   |
|             |                |              | -1959: CCTTTTTTTGG |   |
| <i>NI3*</i> | Solyc06g065210 | XM_004241789 | —                  | 0 |
| <i>NI4*</i> | Solyc11g020610 | XM_004250368 | -714: CTTTTATAAG   | 4 |
|             |                |              | -1386: CTTTTTTTTG  |   |
|             |                |              | -1848: CAAATTTAAG  |   |
|             |                |              | -1987: CTTTTATTTG  |   |

---

|                     |              |                |              |                                                                                                    |   |
|---------------------|--------------|----------------|--------------|----------------------------------------------------------------------------------------------------|---|
|                     | <i>NI5*</i>  | Solyc11g067050 | XM_004250984 | -1168: CATAAAAAAG                                                                                  | 1 |
| Invertase inhibitor | <i>VIF*</i>  | Solyc12g099190 | KC007445     | -1511: CTATTAAG<br>-1575: CTAATATATG<br>-1590: CATTATTTTG<br>-1780: CTATATTAAG                     | 4 |
|                     | <i>CIF1</i>  | Solyc12g099200 | NM_001247862 | -1320: CATAATAAG<br>-1641: CAATAATATG                                                              | 2 |
|                     | <i>CIF2*</i> | Solyc12g099210 | XM_004252882 | —                                                                                                  | 0 |
| Sucrose synthase    | <i>SS1</i>   | Solyc12g009300 | NM_001247726 | -1759: CTATAAAAAG                                                                                  | 1 |
|                     | <i>SS3</i>   | Solyc07g042550 | NM_001247875 | -388: CATTATTTG<br>-1074: CATTTTTTTG<br>-1373: CTAAAAAAG<br>-1539: CTATAAAAAG<br>-1867: CATAAAAAAG | 5 |
|                     | <i>SS4</i>   | Solyc09g098590 | HM180943     | -647: CAATAAATTG<br>-778: CTATATATTG<br>-1550: CAAATTTTAG<br>-1663: CTAAATTTTG                     | 4 |
|                     | <i>SS5*</i>  | Solyc07g042520 | XM_004243632 | -449: CATTATAATG                                                                                   | 4 |

---

|                   |               |                |              |                   |   |
|-------------------|---------------|----------------|--------------|-------------------|---|
|                   |               |                |              | -516: CTATATATAG  |   |
|                   |               |                |              | -772: CTTAAAATAG  |   |
|                   |               |                |              | -1201: CCTAAATAGG |   |
|                   | <i>SS6*</i>   | Solyc03g098290 | XM_004235340 | -724: CAAATTTATG  | 2 |
|                   |               |                |              | -841: CTAATATTTG  |   |
|                   | <i>SS7*</i>   | Solyc02g081300 | XM_004232624 | —                 | 0 |
| Sucrose phosphate | <i>SPSA1*</i> | Solyc07g007790 | NM_001247910 | -831: CCAAATTAGG  | 3 |
| synthase          |               |                |              | -986: CATTTTTTTG  |   |
|                   |               |                |              | -1383: CAAATTTTAG |   |
|                   | <i>SPSA2</i>  | Solyc08g042000 | JQ086765     | -210: CAAAATTTG   | 9 |
|                   |               |                |              | -222: CATTTTTTTG  |   |
|                   |               |                |              | -391: CATTTTAAAG  |   |
|                   |               |                |              | -455: CTATTAATTG  |   |
|                   |               |                |              | -969: CAAAATAATG  |   |
|                   |               |                |              | -1251: CAAATTAAG  |   |
|                   |               |                |              | -1472: CATTATAAG  |   |
|                   |               |                |              | -1732: CCAATTTAGG |   |
|                   |               |                |              | -1934: CTAATATATG |   |
|                   | <i>SPSB</i>   | Solyc09g092130 | JQ086766     |                   | 3 |
|                   |               |                |              | -40: CATTTTTTTG   |   |

---



---

|              |              |                |              |                    |   |
|--------------|--------------|----------------|--------------|--------------------|---|
|              |              |                |              | -123: CATTTTTTTG   |   |
|              |              |                |              | -1476: CAAATAATTG  |   |
|              | <i>SPSC*</i> | Solyc11g045110 | XM_004250713 | -324: CATATATTAG   | 8 |
|              |              |                |              | -378: CATATATTAG   |   |
|              |              |                |              | -843: CTTTTATTAG   |   |
|              |              |                |              | -1084: CTTTAAATAG  |   |
|              |              |                |              | -1333: CTTATATATG  |   |
|              |              |                |              | -1538: CAATATATAG  |   |
|              |              |                |              | -1717: CTTTATAAAG  |   |
|              |              |                |              | -1959: CTTTTTAAAG  |   |
| Fructokinase | <i>FK1</i>   | Solyc03g006860 | NM_001246964 | -539: CAATAAATAG   | 1 |
|              | <i>FK2</i>   | Solyc06g073190 | NM_001246959 | -115: CTATATAAAG   | 6 |
|              |              |                |              | -337: CTTTTTTTTG   |   |
|              |              |                |              | -1020: CTATATTTAG  |   |
|              |              |                |              | -1274: CATTTTTTTAG |   |
|              |              |                |              | -1393: CTTATAATTG  |   |
|              |              |                |              | -1536: CAATAAAAAG  |   |
|              | <i>FK3</i>   | Solyc02g091490 | NM_001247467 | -612: CTTTAATAAG   | 2 |
|              |              |                |              | -1642: CTTATTTTAG  |   |

---

|            |                  |                |              |                                                                                                                                             |    |
|------------|------------------|----------------|--------------|---------------------------------------------------------------------------------------------------------------------------------------------|----|
|            | <i>FK4</i>       | Solyc10g017620 | AY099454     | —                                                                                                                                           | 0  |
|            | <i>FK-Like1*</i> | Solyc09g011850 | XM_004246314 | -286: CATTAATTTG<br>-656: CAAATTATAG<br>-828: CATAAAATTG                                                                                    | 3  |
|            | <i>FK-Like2*</i> | Solyc05g012100 | XM_004238987 | -176: CCATTATTGG<br>-699: CAAAAAAAAAG                                                                                                       | 2  |
| Hexokinase | <i>HK1</i>       | Solyc03g121070 | NM_001247028 | -239: CAAAATTATG<br>-327: CTTTTTTTTG<br>-551: CAATAAAATG<br>-624: CATATATAAG<br>-1141: CAAATATTTG<br>-1638: CAAATAAATG<br>-1656: CATTAATAAG | 7  |
|            | <i>HK2</i>       | Solyc06g066440 | NM_001247477 | -692: CTAAATAAG<br>-729: CTATAAATAG<br>-749: CTTTTATTTG                                                                                     | 3  |
|            | <i>HK3</i>       | Solyc12g008510 | NM_001247781 | -169: CTAAAAAAG<br>-446: CTAAAATAAG<br>-540: CAATTTTAAG                                                                                     | 10 |

---

|             |                |              |                   |   |
|-------------|----------------|--------------|-------------------|---|
|             |                |              | -629: CTTATTATAG  |   |
|             |                |              | -837: CTATATATAG  |   |
|             |                |              | -1088: CTTAAAAAAG |   |
|             |                |              | -1204: CTAAAAAAG  |   |
|             |                |              | -1841: CTTTTTTTTG |   |
|             |                |              | -1880: CTAATTAATG |   |
|             |                |              | -1969: CATATAAAAG |   |
| <i>HK4</i>  | Solyc04g081400 | NM_001247788 | -311: CTAAATTTAG  | 3 |
|             |                |              | -549: CAAAATTTTG  |   |
|             |                |              | -1926: CTAATATAAG |   |
| <i>HK5*</i> | Solyc02g091830 | XM_004251306 | -1078: CAATTATATG | 3 |
|             |                |              | -1276: CAATTATATG |   |
|             |                |              | -1305: CAAATATATG |   |
| <i>HK6*</i> | Solyc11g065220 | XM_004231915 | -691: CAATTTAATG  | 4 |
|             |                |              | -1067: CTATTAAAAG |   |
|             |                |              | -1165: CTTTATAATG |   |
|             |                |              | -1882: CATATTAATG |   |

---

Unreported genes were asterisked.

**Supplemental Table S2.** *Primers used in qRT-PCR analysis of sucrose metabolism genes*

| <b>Primer</b> | <b>Sequence</b>           |
|---------------|---------------------------|
| qFK1-F        | GTTGCAGCCAACGAGACATG      |
| qFK1-R        | AAGGCTTTCCAGCATTTTCCTT    |
| qFK2-F        | CGACGATGAGTTCGGTCACA      |
| qFK2-R        | GGCGCCCTTGTCAAAATTAA      |
| qFK3-F        | AGATGCGCTGTCAAAGCAACT     |
| qFK3-R        | CACTTGGCAATGCTCTTCCTT     |
| qFK Like1-F   | ACAGCTTCGCTTTGCTATTGC     |
| qFK Like1-R   | TTCTGTGTGGCGCTTTCAGT      |
| qFK Like2-F   | TTGCAAATGTTGATGCCGATA     |
| qFK Like2-R   | GGCCATCCATACGTGAAGCT      |
| qHK1-F        | TCTTGCTGCCTCTCATTCAATG    |
| qHK1-R        | TTCCCTCTAGCAAGATATGGCTTT  |
| qHK2-F        | TTCCCTGGGAATGCCAACATATT   |
| qHK2-R        | GGGAGAATTAGCAGTTTGCTGAGT  |
| qHK3-F        | CTTGCTAAAGGGAACCCACTTCT   |
| qHK3-R        | GCATGACACAGTGCACAAGGA     |
| qHK4-F        | ACAGAGCTACTAGGCTCGGAAA    |
| qHK4-R        | GCAGCTAATAATGCAGCTCCAA    |
| qHK5-F        | GGGAGATGCTTGGCAATGAA      |
| qHK5-R        | AAGCGGCAATGTAGATGGAACT    |
| qHK6-F        | TACCCGATGTGCCAGTGAAA      |
| qHK6-R        | CCACTCCCATCTCGACCAAT      |
| qSS1-F        | CAAGTACCGTAAGATGGCTGAA    |
| qSS1-R        | TGAAACACTAAACAGAAGCCTCTAC |
| qSS3-F        | TTAGAAATTGTTTGCCCCACAT    |
| qSS3-R        | CTACAGAAGGGAAAAATGGCAAAT  |
| qSS4-F        | AGTTCCGTGAGTTGGTAAAATCTGT |

---

|          |                             |
|----------|-----------------------------|
| qSS4-R   | TGGTATGCTCCACGTTATTTATTCC   |
| qSS5-F   | TTATCACAGAGGCGCTCACAAT      |
| qSS5-R   | TTGCGTGTTATGGTTGACAATG      |
| qSS6-F   | GGGCAAAAGCAGGCTAAACA        |
| qSS6-R   | CAACTGGCAAGGGCTCTTCA        |
| qSS7-F   | TGGCCATTGATGAATAGTTGAAA     |
| qSS7-R   | GAGGAAGGAATTGCATTCAGAAA     |
| qSPSA1-F | GCAAGTTACGTGCAAGGATCAA      |
| qSPSA1-R | CCCAGGAGGAATTACAGCCATA      |
| qSPSA2-F | GGAAGTTGCAGCAAGGAAGATATT    |
| qSPSA2-R | TTAACCTCCTCAGCGGAAATC       |
| qSPSB-F  | CCTGTGGCACGAGTGTAGGA        |
| qSPSB-R  | TTCCATTGCGGGTGTCTCAT        |
| qSPSC-F  | CCAGGAGCCGAAGTAAGGAA        |
| qSPSC-R  | TCAACCTTGATGCAGCATGTG       |
| qLIN5-F  | CTGAATGCTTGGAGCATGGAT       |
| qLIN5-R  | GAGGATTTTTGTGAACATCATCTACTG |
| qLIN6-F  | AGCACATTTATTCGCCTTCAACAA    |
| qLIN6-R  | CTTTGTGACGTGGCATAATAAGAT    |
| qLIN7-F  | GAACGGAGCCAATCACAATTG       |
| qLIN7-R  | TCCCCCTTTTACCATAGTTCCTT     |
| qLIN8-F  | AGTCATTGAATGCATGGAGCAT      |
| qLIN8-R  | GAGCAATCAAATACGTCACCACAA    |
| qLIN9-F  | ACTGGGTCAACCAACGAATC        |
| qLIN9-R  | TGCCCTCATACTTGATCCAT        |
| qVI-F    | TCCTTCCCTTTGCAAGACTTGT      |
| qVI-R    | TCTCCCTCTTCCCTTTCTTGATG     |
| qNI1-F   | GCCTCTTGATGGAAGGAATGGT      |
| qNI1-R   | CCAGAATCAACAGGTGCAACAC      |

---

---

|         |                            |
|---------|----------------------------|
| qNI2-F  | TTCTTTTCTGGGTCTTCCATTCA    |
| qNI2-R  | TCCATTGCCCAAATAACGAGAT     |
| qNI3-F  | GACTGGACGGCCACAAATTG       |
| qNI3-R  | CCAATGTATCTGCCGAGCTTT      |
| qNI4-F  | CATTAAGACGGGACGACCACAA     |
| qNI4-R  | ACCAATATATCTTCCAACGTACCA   |
| qNI5-F  | AATGGGAAGTCGATGCACACT      |
| qNI5-R  | CCATTTTCCTGCTTCATGTTCTG    |
| qVIF-F  | CATGGTGGATGCGGTGAA         |
| qVIF-R  | GCCACTCAGGGTTCGATTTTC      |
| qCIF1-F | GTTGGTAGAGCCATTGTAAGAAATTT |
| qCIF1-R | TGATCATAATGTGACGAATCGAAT   |
| qCIF2-F | CTGGAGATGCACAAGAATGTGA     |
| qCIF2-R | TATTAAGAGAGGCTTATTGATTCAC  |
| qRIN-F  | GGATACGATAATGTACAACCCGAAA  |
| qRIN-R  | CAAAGCATCCATCCAGGTACAA     |
| qNOR-F  | AGAGAACGATGCATGGAGGTTTGT   |
| qNOR-R  | ACTGGCTCAGGAAATTGGCAATGG   |
| qLePG-F | TGGACAAGTATGGTGGCCAAGTTC   |
| qLePG-R | TCCAGAAGGTTAAGGCCGTTGG     |
| qEXP1-F | CTGCCACCAAATTACGCGTTG      |
| qEXP1-R | TGGGATCCTGCGATAAGTTACAGG   |
| qACS2-F | AATGTCAAGAGCCAGGGTGGTTCC   |
| qACS2-R | TCCTCGCGAGCGCAATATCAAC     |
| qACO1-F | ACGGGAAGTACAAGAGTGTGCTG    |
| qACO1-R | ACATTCGTGTCCCGTCTGTTTGTG   |
| qPSY1-F | ATGAGGCAGAGAAAGGCGTGAC     |
| qPSY1-R | CAAGACCAAAGATGCCCATACAGG   |
| qPDS-F  | TTTGTGTTTGCCGCTCCAGTG      |

---

---

|          |                          |
|----------|--------------------------|
| qPDS-R   | ACAGGTACTCCGACTAACTTCTCC |
| qACTIN-F | TGTCCCTATTTACGAGGGTTATGC |
| qACTIN-R | AGTTAAATCACGACCAGCAAGAT  |

---

**Supplemental Table S3.** *Ripening marker genes used for qRT-PCR analysis in this study*

| <b>Gene</b> | <b>ITAG gene ID<sup>a</sup></b> | <b>Description</b>                           |
|-------------|---------------------------------|----------------------------------------------|
| <i>RIN</i>  | Solyc05g012020                  | Ripening inhibitor                           |
| <i>NOR</i>  | Solyc10g006880                  | Non-ripening                                 |
| <i>LePG</i> | Solyc10g080210                  | Polygalacturonase A                          |
| <i>EXPI</i> | Solyc06g051800                  | Expansin 1                                   |
| <i>ACS2</i> | Solyc01g095080                  | 1-aminocyclopropane-1-carboxylate synthase 2 |
| <i>ACO1</i> | Solyc07g049530                  | 1-aminocyclopropane-1-carboxylate oxidase    |
| <i>PSY1</i> | Solyc03g031860                  | Phytoene synthase 1                          |
| <i>PDS</i>  | Solyc03g123760                  | Phytoene desaturase                          |

<sup>a</sup>ITAG, the International Tomato Annotation Group release version 2.3.



**Supplemental Table S4.** *Gene-specific primers used in ChIP-qPCR assay*

| <b>Primer</b> | <b>Sequence</b>            |
|---------------|----------------------------|
| VI-F1         | CGTTTTTGGACAAATCTTCATTATC  |
| VI-R1         | GAATTGGAGATGATATGACAATACT  |
| VI-F2         | ATGGTAACCTTTGGAGTGATTTCTC  |
| VI-R2         | AGAGAAGTAAAATGGAAGATAAGAC  |
| CIF1-F1       | TAGATTCGCCTCAAAGAAATACACA  |
| CIF1-R1       | TTGAGTGGTGCAATATAAGTCTAGT  |
| CIF1-F2       | GTTCCAAGGAATCAACCCAAAAAG   |
| CIF1-R2       | CATTATCCTTGTGAAAGTGGAATGC  |
| SPSA1-F1      | ATGGTAAGCTCACATTCCTTCTGAA  |
| SPSA1-R1      | GATTGGTGAAGCGCCTAAATTAATC  |
| SPSA1-F2      | AAGTATTGATGACTAGCGGCGAT    |
| SPSA1-R2      | ATGTGTTAGAATGAGAATCGTCGAA  |
| SPSB-F1       | CTACCTTAGCATATGTGTCACCCTT  |
| SPSB-R1       | GAAGAGGAAAACCATGTGAAAGGAA  |
| SPSB-F2       | ATCTCTCATTCACATATCTCACCAT  |
| SPSB-R2       | TTTGCTATTTCTAACTTACCCACCT  |
| FK like1-F1   | GCCCGATGTTTTATTTCGATTCATT  |
| FK like1-R1   | TAAATCGATGACAACCTTTCCATTC  |
| FK like1-F2   | CCTTGATTTCTCCAACCTGCTT     |
| FK like1-R2   | GGGACATCTTGATTGTAATTTTACC  |
| FK like2-F1   | GAAACTTTATCACTGATAGAGCACA  |
| FK like2-R1   | AAATCGTGTTATGGTAACTTCAAGC  |
| FK like2-F2   | CCAATTTCTCTTTACTACTTCACAG  |
| FK like2-R2   | ATCTTTACAACCCTGAAGACCCAAT  |
| HK4-F1        | CATATTTGCATAATGTGTTCCATAGC |
| HK4-R1        | TCGTCCTACCTGCGCAATTTTC     |
| HK4-F2        | CCTTCCTTTTATTTCGTGTGTTTTG  |

---

|         |                             |
|---------|-----------------------------|
| HK4-R2  | CTGTTTCGTTACTTTCATAGTGCTGA  |
| SS4-F1  | CTCATCCCACCCATTGTCATCCCC    |
| SS4-R1  | CAACCATTTGTCACCGTACCCTCA    |
| SS4-F2  | CGTTTTGGAATCCGTTGAATGGTA    |
| SS4-R2  | GTATAGTTCACTATTCTTGGATGAC   |
| SS6-F1  | AGGATAACGTGAAGAGGGTCA       |
| SS6-R1  | CAGTTGGAAGGAAGGGGGGA        |
| VIF-F1  | GCCACGTTTTTCATGTTGTAATGTC   |
| VIF-R1  | GGACAACATCGCAAGTTGGATC      |
| VIF-F2  | GAGTTGTAAGGAGCATCAAATCGTA   |
| VIF-R2  | ATGAATCACCATTAATAGGTGCAAG   |
| LIN7-F1 | AAGGGTGTATCCAAC TTTAGCGA    |
| LIN7-R1 | GCTCCAAGCATT CAGAGTCTCAA    |
| LIN7-F2 | TTTGTTAGCTTTCCTTTTTGTTTTG   |
| LIN7-R2 | CATCTTTATTCATTTGCGATTGTTT   |
| LIN8-F1 | ATAGTGAATGACAAAGACGGGTG     |
| LIN8-R1 | TATCTTCCTTTCTCCCCACTCTT     |
| LIN8-F2 | GATCACTTCAACTTTGATGAGAACC   |
| LIN8-R2 | TTGGGAGGTTACATTACGCTGAA     |
| NI2-F1  | CTCAAATGACAAATATACTGGAGAAG  |
| NI2-R1  | TGGAGATTTTATACTTACAGCTAAC   |
| NI2-F2  | GTGAGCAATTTAGAGCGAAAATAACT  |
| NI2-R2  | GAAAGCAAAAAGCCTATCGCAAAC    |
| NI4-F1  | GAGGAATAATATGAGTGGAAATAAG   |
| NI4-R1  | AACCTTAATATCCTACTTGACATGA   |
| NI4-F2  | GGTCTATCTCTGGACTCTACTC      |
| NI4-R2  | GAACAAGAGCGAAACAAAAGATAGT   |
| SS3-F1  | GTTTCATGTACCTTTCGTTTTTCAGAG |
| SS3-R1  | CATTGTTTTCTATCCGTGACGGT     |

---

---

|         |                           |
|---------|---------------------------|
| SS3-F2  | GGTCGTTTACGTATCCTATTCTGC  |
| SS3-R2  | TCAACTCGTCCGATCAAATAAC    |
| HK3-F1  | TGCGGCCTAATTTGATTTAATACGA |
| HK3-R1  | TCGTTTCAATTTATCTTACTCCGTC |
| HK3-F2  | TGGGACCTACTCTTTGTTATCATC  |
| HK3-R2  | TTGATGTGTGGGAGTGACAGAGA   |
| HK6-F1  | TCAAGAACACATAATACGAAAAATC |
| HK6-R1  | AGACTCTTGTTATTTTCTTTTCACT |
| HK6-F2  | TCAAACCTAAATGGCAATTACCGTA |
| HK6-R2  | GTTATTTGTGAAAGCGAAGGTCTGA |
| ACS2-F1 | TCACAAACGAGCTATTCTAAAAA   |
| ACS2-R1 | CCTTACATCATTTATTATTACAA   |

---

**Supplemental Table S5.** *Primers used for probes of EMSA*

| <b>Primer</b> | <b>Sequence</b>               |
|---------------|-------------------------------|
| VI-F          | TTCTCACTCTATAAATAGGGTTGTTT    |
| VI-R          | AAACAACCCTATTTATAGAGTGAGAA    |
| VIF-F         | AGTAATAACTATTTAAAAGTGTAATAAC  |
| VIF-R         | GTATTTTACACTTTTAATAGTTATTACT  |
| CIF1-F        | GAGAAAGCATAATAAAGTGATGCAT     |
| CIF1-R        | ATGCATCACTTTATTATGCCTTTCTC    |
| LIN7-F        | ATGTAGAACTAATATTTGGTAATATT    |
| LIN7-R        | GTAAAAACAAATAAATGTGCATTAT     |
| LIN8-F        | ATGAGAACCATATTAATGTATTGAGG    |
| LIN8-R        | CCTCAATACATTAATATGGTTCTCAT    |
| NI2-F         | TTTGTAACAAATTTATGTTCAAATA     |
| NI2-R         | TATTTGAACATAAATTTGTTTACAAA    |
| NI4-F         | ACTCTACTCTCTTTTATAAGTTTTCTAT  |
| NI4-R         | ATAGAAAACCTTATAAAAGAGAGTAGAGT |

**Supplemental Table S6.** Identification of the differentially expressed proteins in the *SIVIF* silenced tomato fruit (*vif*) using *iTRAQ*-based quantitative proteomic analysis

| Accession number <sup>a</sup>       | Name                                                 | Fold-change<br>( <i>vif</i> :WT) at<br>38 dpa <sup>b</sup> | ±SD  | Fold-change<br>( <i>vif</i> :WT) at<br>41 dpa <sup>c</sup> | ±SD  | Confident<br>peptides <sup>d</sup> | %Seq<br>cov <sup>e</sup> |
|-------------------------------------|------------------------------------------------------|------------------------------------------------------------|------|------------------------------------------------------------|------|------------------------------------|--------------------------|
| <b>Amino acid metabolic process</b> |                                                      |                                                            |      |                                                            |      |                                    |                          |
| Solyc01g112280.2.1                  | Succinyl-diaminopimelate desuccinylase               | 1.40                                                       | 0.11 | 0.12                                                       | 0.00 | 17.00                              | 46.32                    |
| Solyc02g091560.2.1                  | Serine hydroxymethyltransferase (SHMT)               | 3.09                                                       | 0.11 | 0.53                                                       | 0.06 | 43.25                              | 59.94                    |
| Solyc03g098240.2.1                  | Glutamate decarboxylase (GAD1)                       | 1.69                                                       | 0.11 | 0.50                                                       | 0.01 | 29.25                              | 39.89                    |
| Solyc04g054310.2.1                  | Alanine-glyoxylate aminotransferase, class-III (AGT) | 0.37                                                       | 0.04 | 0.61                                                       | 0.04 | 13.25                              | 33.88                    |
| Solyc06g019170.2.1                  | Gamma-glutamyl phosphate reductase (GPR)             | 1.28                                                       | 0.06 | 0.50                                                       | 0.02 | 27.00                              | 35.08                    |
| Solyc07g032740.2.1                  | Aspartate aminotransferase (AST)                     | 1.00                                                       | 0.05 | 0.46                                                       | 0.02 | 25.25                              | 59.73                    |
| Solyc07g053720.2.1                  | Tyrosine aminotransferase-like protein (TAT)         | 2.18                                                       | 0.86 | 2.46                                                       | 1.19 | 2.50                               | 9.48                     |
| Solyc08g014130.2.1                  | 2-isopropylmalate synthase 1 ( <i>leuA</i> )         | 0.37                                                       | 0.04 | 0.33                                                       | 0.01 | 38.50                              | 55.01                    |
| Solyc08g065220.2.1                  | Glycine dehydrogenase P protein (GLDC)               | 2.19                                                       | 0.13 | 1.06                                                       | 0.16 | 25.25                              | 28.98                    |

|                                       |                                                       |      |      |      |      |       |       |
|---------------------------------------|-------------------------------------------------------|------|------|------|------|-------|-------|
| Solyc09g007910.2.1                    | Phenylalanine ammonia-lyase (PAL)                     | 0.35 | 0.11 | 2.30 | 1.04 | 6.75  | 19.45 |
| Solyc09g008670.2.1                    | Threonine ammonia-lyase                               | 2.04 | 1.09 | 1.34 | 0.23 | 3.25  | 8.40  |
| Solyc11g011920.1.1                    | Glutamate decarboxylase (GAD2)                        | 1.22 | 0.08 | 2.42 | 0.03 | 23.25 | 39.86 |
| Solyc11g012970.1.1                    | Aminoacylase-1 (ACY1)                                 | 1.24 | 0.15 | 0.17 | 0.05 | 10.00 | 41.72 |
| Solyc12g005860.1.1                    | 3-isopropylmalate dehydratase large subunit (leuC)    | 0.49 | 0.02 | 0.70 | 0.04 | 70.25 | 56.78 |
| Solyc12g088220.1.1                    | Branched-chain amino acid aminotransferase II (BCAT2) | 0.39 | 0.12 | 0.66 | 0.09 | 4.25  | 18.23 |
| Solyc12g096190.1.1                    | Tryptophan synthase, beta chain-like                  | 2.12 | 0.24 | 1.04 | 0.08 | 16.00 | 32.72 |
| <b>Carbohydrate metabolic process</b> |                                                       |      |      |      |      |       |       |
| Solyc01g008710.2.1                    | Mannan endo-1 4-beta-mannosidase (MAN4)               | 0.08 | 0.03 | 0.24 | 0.02 | 6.50  | 17.36 |
| Solyc01g060020.2.1                    | Beta-glucanase                                        | 0.37 | 0.01 | 1.80 | 0.36 | 5.50  | 19.79 |
| Solyc01g074030.2.1                    | Beta-glucosidase 01 Xyloglucan                        | 0.47 | 0.11 | 1.22 | 0.09 | 4.75  | 11.02 |
| Solyc01g099630.2.1                    | endotransglucosylase/hydrolase 5 (XTH1)               | 0.78 | 0.04 | 3.29 | 0.21 | 9.50  | 31.93 |
| Solyc01g104950.2.1                    | Alpha-L-arabinofuranosidase/ $\beta$ -D-xylosidase    | 0.50 | 0.01 | 1.02 | 0.03 | 15.50 | 21.78 |

|                    |                                                      |      |      |      |      |       |       |
|--------------------|------------------------------------------------------|------|------|------|------|-------|-------|
| Solyc01g107830.2.1 | UDP-glucosyltransferase family 1 protein (UGT1)      | 0.87 | 0.18 | 0.40 | 0.01 | 7.25  | 23.55 |
| Solyc01g110360.2.1 | Fructose-bisphosphate aldolase, class-I              | 2.10 | 0.02 | 0.66 | 0.02 | 8.00  | 51.01 |
| Solyc02g062340.2.1 | Fructose-bisphosphate aldolase, class-I              | 1.83 | 0.07 | 0.46 | 0.13 | 8.75  | 50.76 |
| Solyc02g070020.1.1 | UDP-glucosyltransferase (UGT)                        | 0.14 | 0.04 | 0.41 | 0.01 | 7.00  | 18.21 |
| Solyc02g087770.2.1 | Aldose-1-epimerase-like protein                      | 0.72 | 0.10 | 2.18 | 0.08 | 12.25 | 24.93 |
| Solyc03g019790.2.1 | Alpha-galactosidase                                  | 2.14 | 0.25 | 1.27 | 0.15 | 21.00 | 44.31 |
| Solyc03g065340.2.1 | Glycogen/starch/alpha-glucan phosphorylase           | 2.10 | 0.19 | 1.50 | 0.10 | 53.75 | 52.61 |
| Solyc03g083910.2.1 | Acid beta-fructofuranosidase/vacuolar invertase (VI) | 0.19 | 0.03 | 1.15 | 0.06 | 66.25 | 51.00 |
| Solyc03g098290.2.1 | Sucrose synthase (SuSy6)                             | 0.33 | 0.03 | 0.67 | 0.12 | 3.75  | 4.29  |
| Solyc03g113030.2.1 | Aldose 1-epimerase-like protein                      | 0.46 | 0.03 | 0.56 | 0.03 | 10.50 | 30.84 |
| Solyc03g123830.2.1 | Phosphoglycerate dehydrogenase (PHGDH)               | 4.46 | 0.50 | 2.95 | 0.20 | 22.25 | 39.95 |
| Solyc04g016470.2.1 | Beta-1, 3-glucanase                                  | 0.45 | 0.05 | 0.89 | 0.04 | 4.25  | 19.64 |
| Solyc05g007070.2.1 | Alpha amylase 2 (IC)                                 | 2.47 | 0.68 | 0.94 | 0.06 | 6.75  | 10.90 |
| Solyc05g050800.2.1 | Phosphoglycerate mutase family protein (PGAM)        | 0.43 | 0.05 | 1.63 | 0.21 | 12.00 | 44.61 |

|                    |                                                              |      |      |      |      |        |       |
|--------------------|--------------------------------------------------------------|------|------|------|------|--------|-------|
| Solyc07g007790.2.1 | Sucrose phosphate synthase (SPSA1)                           | 1.21 | 0.14 | 0.49 | 0.04 | 37.75  | 32.57 |
| Solyc07g009380.2.1 | Xyloglucan endotransglucosylase/hydrolase 2 (XET2)           | 0.90 | 0.04 | 4.46 | 1.40 | 3.50   | 14.55 |
| Solyc07g052480.2.1 | Isocitrate lyase                                             | 0.44 | 0.09 | 3.45 | 1.44 | 2.75   | 6.30  |
| Solyc07g056140.2.1 | Glucose-1-phosphate adenylyltransferase                      | 2.25 | 0.28 | 1.13 | 0.09 | 12.25  | 29.27 |
| Solyc07g065900.2.1 | Fructose-bisphosphate aldolase, class-I (FBA)                | 1.43 | 0.15 | 0.47 | 0.32 | 5.50   | 34.80 |
| Solyc08g083320.2.1 | Granule-bound starch synthase (GBSS)                         | 7.28 | 1.74 | 0.99 | 0.46 | 6.25   | 14.53 |
| Solyc09g009020.2.1 | Enolase (ENO)                                                | 2.18 | 0.25 | 1.16 | 0.16 | 102.50 | 76.41 |
| Solyc09g031970.2.1 | Glycogen/starch/alpha-glucan phosphorylase                   | 2.62 | 0.18 | 0.94 | 0.07 | 16.25  | 33.81 |
| Solyc09g092330.1.1 | NAD dependent epimerase/dehydratase family protein expressed | 1.49 | 0.21 | 2.03 | 0.04 | 1.00   | 2.21  |
| Solyc09g092500.1.1 | UDP-glucosyltransferase family 1 protein (UGT1)              | 0.43 | 0.06 | 1.02 | 0.08 | 11.00  | 30.27 |
| Solyc09g098040.2.1 | Phosphoglucan water dikinase                                 | 3.86 | 1.34 | 0.85 | 0.19 | 15.50  | 18.86 |
| Solyc10g007600.2.1 | L-lactate dehydrogenase (LDHA)                               | 0.12 | 0.02 | 1.60 | 0.21 | 16.75  | 43.94 |



|                                         |                                                   |      |      |      |      |       |       |
|-----------------------------------------|---------------------------------------------------|------|------|------|------|-------|-------|
| Solyc10g085220.1.1                      | Mitochondrial carrier protein expressed           | 1.04 | 0.12 | 2.42 | 0.60 | 4.00  | 6.52  |
| Solyc10g085230.1.1                      | UDP-glucosyltransferase (UGT)                     | 0.31 | 0.05 | 0.88 | 0.02 | 8.00  | 20.53 |
| Solyc10g085880.1.1                      | UDP-glucosyltransferase family 1 protein (UGT1)   | 0.08 | 0.02 | 0.55 | 0.01 | 39.50 | 50.73 |
| Solyc12g009300.1.1                      | Sucrose synthase (SuSy1)                          | 1.88 | 0.10 | 2.33 | 0.19 | 62.25 | 55.25 |
| Solyc12g094640.1.1                      | Glyceraldehyde-3-phosphate dehydrogenase B (GAPB) | 0.68 | 0.10 | 0.46 | 0.05 | 3.50  | 37.17 |
| Solyc12g098600.1.1                      | UDP-glucosyltransferase family 1 protein (UGT1)   | 2.38 | 0.53 | 0.96 | 0.23 | 8.25  | 21.54 |
| Solyc12g099200.1.1                      | Cell-wall Invertase inhibitor                     | 2.66 | 0.61 | 1.28 | 0.07 | 9.25  | 56.29 |
| <b>Cell wall biogenesis/degradation</b> |                                                   |      |      |      |      |       |       |
| Solyc03g111690.2.1                      | Pectate lyase                                     | 0.04 | 0.01 | 0.62 | 0.05 | 13.75 | 32.01 |
| Solyc03g116230.2.1                      | Agglutinin isolectin I (Fragment)                 | 2.18 | 0.63 | 1.19 | 0.02 | 5.25  | 10.51 |
| Solyc03g123630.2.1                      | Pectinesterase (PMEU1)                            | 1.07 | 0.07 | 2.58 | 0.28 | 47.00 | 42.54 |
| Solyc04g049070.2.1                      | Alpha glucosidase II                              | 0.94 | 0.04 | 0.40 | 0.07 | 14.50 | 17.97 |
| Solyc05g050130.2.1                      | Acidic chitinase                                  | 0.44 | 0.10 | 2.10 | 0.34 | 4.75  | 17.55 |
| Solyc07g005100.2.1                      | Chitinase II (Cht2)                               | 4.88 | 0.53 | 1.02 | 0.21 | 16.25 | 28.59 |
| Solyc07g064180.2.1                      | Pectinesterase (PME2.1)                           | 4.07 | 1.75 | 0.58 | 0.03 | 8.00  | 36.95 |

|                                   |                                                        |      |      |      |      |       |       |
|-----------------------------------|--------------------------------------------------------|------|------|------|------|-------|-------|
| Solyc07g065090.1.1                | Polygalacturonase inhibitor protein                    | 4.92 | 0.72 | 1.29 | 0.11 | 9.25  | 24.77 |
| Solyc09g010860.2.1                | Expansin (EXPA4)                                       | 0.18 | 0.09 | 0.86 | 0.22 | 2.00  | 11.41 |
| Solyc09g014480.1.1                | Polygalacturonase inhibitor protein                    | 0.50 | 0.04 | 1.37 | 0.30 | 1.00  | 6.72  |
| Solyc10g055800.1.1                | Chitinase                                              | 0.58 | 0.16 | 2.61 | 0.63 | 6.50  | 28.57 |
| Solyc10g055810.1.1                | Endochitinase (CHI9)                                   | 0.08 | 0.02 | 2.12 | 0.31 | 4.50  | 29.89 |
| Solyc10g080210.1.1                | Polygalacturonase A (LePG)                             | 0.03 | 0.00 | 0.07 | 0.01 | 49.75 | 49.45 |
| Solyc11g005150.1.1                | Leucine-rich repeat Extensin-like family protein (LRX) | 0.62 | 0.08 | 0.47 | 0.05 | 7.25  | 11.27 |
| Solyc11g008720.1.1                | Beta-glucosidase G4                                    | 0.27 | 0.11 | 0.53 | 0.11 | 5.00  | 13.19 |
| Solyc12g099660.1.1                | Glucosidase 2 subunit beta                             | 1.02 | 0.07 | 0.48 | 0.05 | 9.00  | 17.56 |
| <b>Cellular metabolic process</b> |                                                        |      |      |      |      |       |       |
| Solyc01g090230.2.1                | GRAM domain containing protein                         | 2.95 | 2.16 | 1.27 | 0.07 | 1.00  | 4.11  |
| Solyc01g097880.2.1                | Cytidine deaminase-like                                | 0.23 | 0.03 | 0.48 | 0.05 | 9.75  | 49.46 |
| Solyc01g099590.2.1                | Glutathione-S-transferase (GST)                        | 2.73 | 0.67 | 0.44 | 0.01 | 2.75  | 19.20 |
| Solyc01g101060.2.1                | S-adenosylmethionine synthase (SAM1)                   | 3.29 | 0.52 | 2.82 | 0.04 | 40.00 | 73.15 |
| Solyc01g108560.2.1                | Acetyl esterase                                        | 0.25 | 0.17 | 0.45 | 0.03 | 2.00  | 22.51 |
| Solyc02g036350.2.1                | 1-aminocyclopropane-1-carboxylate oxidase              | 0.20 | 0.03 | 3.54 | 0.51 | 10.75 | 49.69 |

---

|                    |                                                             |      |      |      |      |       |       |
|--------------------|-------------------------------------------------------------|------|------|------|------|-------|-------|
| Solyc02g071150.2.1 | DNA-binding TFAR19-related protein                          | 0.70 | 0.26 | 0.41 | 0.08 | 8.00  | 58.40 |
| Solyc02g091100.2.1 | Oxalyl-CoA decarboxylase                                    | 2.11 | 0.10 | 1.01 | 0.08 | 26.25 | 44.12 |
| Solyc03g025320.2.1 | Hydroxycinnamoyl transferase (AAT2)                         | 0.93 | 0.09 | 2.01 | 0.14 | 10.50 | 25.45 |
| Solyc03g095900.2.1 | 1-aminocyclopropane-1-carboxylate oxidase-like protein (E8) | 0.26 | 0.06 | 1.12 | 0.19 | 2.50  | 14.08 |
| Solyc03g097700.2.1 | O-methyltransferase (OMT)                                   | 0.47 | 0.04 | 0.78 | 0.08 | 13.25 | 42.50 |
| Solyc03g117430.2.1 | Cobalamin synthesis protein P (CobP)                        | 0.81 | 0.09 | 0.47 | 0.08 | 11.25 | 31.92 |
| Solyc03g117870.2.1 | 4-coumarate CoA ligase (4CL)                                | 0.47 | 0.26 | 0.82 | 0.17 | 3.25  | 9.95  |
| Solyc03g123760.2.1 | Phytoene desaturase (PDS)                                   | 0.73 | 0.05 | 0.40 | 0.01 | 8.50  | 17.79 |
| Solyc04g071140.2.1 | Pyridoxal phosphate-dependent decarboxylase                 | 0.42 | 0.21 | 0.87 | 0.15 | 1.00  | 2.90  |
| Solyc05g052240.2.1 | Chalcone isomerase (CHI)                                    | 0.38 | 0.10 | 0.63 | 0.12 | 5.00  | 35.36 |
| Solyc05g052480.2.1 | Multiple inositol polyphosphate phosphatase                 | 1.10 | 0.45 | 0.19 | 0.04 | 2.75  | 6.57  |
| Solyc05g053550.2.1 | Chalcone synthase (CHS2)                                    | 0.25 | 0.18 | 0.67 | 0.09 | 6.50  | 14.78 |
| Solyc07g006180.2.1 | Tetratricopeptide repeat protein 4 homolog                  | 0.52 | 0.04 | 0.44 | 0.03 | 10.75 | 52.87 |

---

|                    |                                                                        |      |      |      |      |        |       |
|--------------------|------------------------------------------------------------------------|------|------|------|------|--------|-------|
| Solyc07g049530.2.1 | 1-aminocyclopropane-1-carboxylate oxidase (ACO1)                       | 0.15 | 0.04 | 1.08 | 0.28 | 32.25  | 72.54 |
| Solyc07g056420.2.1 | Glutathione S-transferase-like protein                                 | 1.25 | 0.21 | 0.29 | 0.04 | 11.00  | 41.02 |
| Solyc07g056510.2.1 | Glutathione S-transferase                                              | 0.45 | 0.19 | 0.24 | 0.07 | 2.50   | 25.12 |
| Solyc07g061790.2.1 | SOUL Heme-binding protein 2 (HEBP2)                                    | 2.85 | 0.24 | 0.84 | 0.06 | 21.75  | 53.82 |
| Solyc07g062530.2.1 | Phosphoenolpyruvate carboxylase 2 (PPC2)                               | 2.89 | 0.35 | 1.26 | 0.16 | 122.00 | 71.14 |
| Solyc08g005770.2.1 | Alcohol acetyltransferase                                              | 0.04 | 0.01 | 0.49 | 0.02 | 22.50  | 43.49 |
| Solyc08g006770.2.1 | Anthocyanidin synthase (Fragment)                                      | 0.26 | 0.06 | 1.48 | 0.07 | 6.75   | 19.16 |
| Solyc08g006890.2.1 | Tubulin alpha-3 chain (TUB)                                            | 1.86 | 0.36 | 2.09 | 0.61 | 23.75  | 57.65 |
| Solyc08g066240.2.1 | Pyridoxal phosphate-dependent decarboxylase                            | 0.06 | 0.02 | 0.39 | 0.03 | 16.25  | 36.20 |
| Solyc08g075210.1.1 | Acyltransferase-like protein                                           | 2.22 | 0.27 | 1.05 | 0.12 | 16.25  | 41.57 |
| Solyc08g076970.2.1 | Acetylnornithine deacetylase or succinyl-diaminopimelate desuccinylase | 2.71 | 0.19 | 1.25 | 0.10 | 30.00  | 59.85 |
| Solyc08g077300.2.1 | Adenylate kinase (ADK)                                                 | 0.59 | 0.10 | 0.42 | 0.17 | 6.00   | 30.67 |
| Solyc08g079110.2.1 | Pentapeptide repeat                                                    | 1.48 | 0.20 | 2.67 | 0.39 | 3.75   | 27.37 |
| Solyc08g079430.2.1 | Primary amine oxidase                                                  | 4.96 | 2.33 | 1.92 | 0.49 | 0.75   | 1.87  |
| Solyc08g080510.2.1 | Replication factor C subunit 4                                         | 2.54 | 2.20 | 1.33 | 0.57 | 1.25   | 8.08  |

|                    |                                                               |      |      |      |      |       |       |
|--------------------|---------------------------------------------------------------|------|------|------|------|-------|-------|
| Solyc09g008280.1.1 | S-adenosylmethionine synthase (SAM3)                          | 1.32 | 0.10 | 2.96 | 0.43 | 9.75  | 57.69 |
| Solyc09g010930.2.1 | NAD-dependent epimerase/dehydratase                           | 0.80 | 0.06 | 0.44 | 0.03 | 16.50 | 66.47 |
| Solyc09g011580.2.1 | Glutathione S-transferase-like protein                        | 0.16 | 0.03 | 1.06 | 0.22 | 9.50  | 36.52 |
| Solyc09g064940.2.1 | Phenazine biosynthesis protein PhzF family                    | 0.43 | 0.03 | 0.85 | 0.04 | 10.00 | 38.45 |
| Solyc09g089580.2.1 | 1-aminocyclopropane-1-carboxylate oxidase-like protein (ACO3) | 0.05 | 0.01 | 0.25 | 0.02 | 47.50 | 56.47 |
| Solyc10g076510.1.1 | Pyruvate decarboxylase (PDC)                                  | 5.92 | 2.17 | 0.32 | 0.06 | 23.50 | 35.45 |
| Solyc10g081650.1.1 | Carotenoid isomerase, chloroplastic (CRTISO)                  | 0.30 | 0.04 | 0.42 | 0.02 | 11.00 | 18.98 |
| Solyc10g084400.1.1 | Glutathione S-transferase/chloride channel                    | 2.58 | 0.95 | 0.31 | 0.00 | 15.25 | 66.60 |
| Solyc10g085040.1.1 | Soul heme-binding family protein (SOUL/HBP)                   | 0.32 | 0.10 | 0.37 | 0.00 | 6.75  | 36.93 |
| Solyc10g085830.1.1 | O-methyltransferase 1 (OMT1)                                  | 0.31 | 0.03 | 0.50 | 0.06 | 15.25 | 47.85 |
| Solyc11g013110.1.1 | Anthocyanidin synthase (ANS)                                  | 0.18 | 0.03 | 1.76 | 0.20 | 15.00 | 42.83 |
| Solyc11g066290.1.1 | Icc family phosphohydrolase                                   | 0.47 | 0.03 | 0.65 | 0.04 | 10.00 | 26.28 |
| Solyc12g011310.1.1 | Glutathione S-transferase                                     | 0.45 | 0.22 | 0.16 | 0.00 | 11.25 | 42.46 |

|                         |                                                  |       |      |       |      |       |       |
|-------------------------|--------------------------------------------------|-------|------|-------|------|-------|-------|
| Solyc12g044600.2.1      | NADP-dependent malic enzyme, chloroplastic (ME1) | 2.11  | 0.04 | 0.81  | 0.02 | 30.00 | 51.13 |
| <b>Defense response</b> |                                                  |       |      |       |      |       |       |
| Solyc00g060810.2.1      | Major latex-like protein                         | 0.71  | 0.09 | 0.35  | 0.02 | 4.25  | 28.42 |
| Solyc00g174340.1.1      | Pathogenesis-related protein 1b (PR-1b)          | 0.03  | 0.01 | 28.38 | 2.41 | 16.50 | 55.97 |
| Solyc01g105410.2.1      | Phosphate-induced protein 1 conserved region     | 0.72  | 0.03 | 2.61  | 0.53 | 3.50  | 15.03 |
| Solyc02g065470.1.1      | Pathogenesis-related protein                     | 1.07  | 0.16 | 2.18  | 0.08 | 9.00  | 44.45 |
| Solyc03g020060.2.1      | Proteinase inhibitor II (PI-II)                  | 11.20 | 2.35 | 1.42  | 0.20 | 6.25  | 29.37 |
| Solyc05g053620.2.1      | F-box protein PP2-B1                             | 0.62  | 0.07 | 2.01  | 0.41 | 3.50  | 26.97 |
| Solyc06g054320.1.1      | Plant disease resistance response protein        | 3.18  | 1.14 | 1.95  | 0.32 | 3.00  | 19.83 |
| Solyc07g006380.2.1      | Defensin-like protein                            | 3.68  | 1.99 | 0.53  | 0.06 | 1.00  | 7.62  |
| Solyc07g007750.2.1      | Defensin protein                                 | 3.04  | 0.45 | 1.34  | 0.40 | 5.75  | 35.20 |
| Solyc08g080640.1.1      | Osmotin-like protein (NP24)                      | 0.25  | 0.01 | 0.83  | 0.12 | 5.50  | 29.56 |
| Solyc09g084440.2.1      | Proteinase inhibitor I (PI-I)                    | 1.58  | 0.17 | 2.36  | 0.89 | 2.00  | 26.57 |
| Solyc09g090330.2.1      | Harpin binding protein 1 (HrBP1)                 | 1.24  | 0.17 | 0.48  | 0.04 | 14.75 | 51.09 |
| Solyc09g091000.2.1      | Major allergen Mal d 1                           | 0.32  | 0.08 | 5.47  | 3.49 | 2.00  | 19.35 |

---

**Lipid metabolic process**

|                    |                                                        |      |      |      |      |        |       |
|--------------------|--------------------------------------------------------|------|------|------|------|--------|-------|
| Solyc01g006540.2.1 | Lipoxygenase (LoxC)                                    | 0.06 | 0.01 | 0.34 | 0.07 | 36.50  | 38.28 |
| Solyc01g088090.2.1 | Hydrolase alpha/beta fold family protein               | 0.38 | 0.30 | 0.47 | 0.18 | 2.50   | 8.74  |
| Solyc01g088400.2.1 | CER1, Fatty acid hydroxylase                           | 0.27 | 0.08 | 1.14 | 0.02 | 5.25   | 10.99 |
| Solyc01g098110.2.1 | Hydrolase alpha/beta fold family protein               | 0.80 | 0.25 | 0.46 | 0.13 | 5.25   | 12.17 |
| Solyc01g099160.2.1 | Lipoxygenase (CEVI34)                                  | 0.53 | 0.02 | 0.50 | 0.02 | 31.50  | 45.30 |
| Solyc01g099190.2.1 | Lipoxygenase (LoxB)                                    | 0.27 | 0.10 | 0.33 | 0.03 | 119.75 | 66.93 |
| Solyc01g111260.2.1 | Phosphatidylinositol-specific phospholipase c          | 2.55 | 0.46 | 1.52 | 0.19 | 8.25   | 35.69 |
| Solyc02g065240.2.1 | Hydrolase alpha/beta fold family protein               | 0.45 | 0.08 | 0.15 | 0.02 | 10.75  | 52.00 |
| Solyc02g069800.1.1 | CXE carboxylesterase                                   | 0.36 | 0.03 | 0.56 | 0.07 | 13.75  | 54.11 |
| Solyc02g081170.2.1 | Plastid-lipid-associated protein, chloroplastic (ChrC) | 1.88 | 0.12 | 0.40 | 0.01 | 20.25  | 64.42 |
| Solyc03g005020.2.1 | Lipase                                                 | 0.07 | 0.02 | 0.61 | 0.13 | 6.25   | 15.99 |
| Solyc03g025720.2.1 | Long-chain-fatty-acid--CoA ligase                      | 2.32 | 0.23 | 0.58 | 0.06 | 17.25  | 34.61 |
| Solyc03g065250.2.1 | CER1, Fatty acid hydroxylase                           | 0.25 | 0.12 | 2.76 | 1.48 | 1.00   | 2.72  |
| Solyc04g054990.2.1 | Lipoxygenase, LH2                                      | 2.28 | 0.24 | 2.73 | 0.12 | 6.50   | 37.39 |

---

|                                    |                                               |      |      |      |      |       |       |
|------------------------------------|-----------------------------------------------|------|------|------|------|-------|-------|
| Solyc05g051850.2.1                 | Inositol-3-phosphate synthase                 | 2.91 | 0.19 | 1.34 | 0.11 | 3.00  | 8.34  |
| Solyc07g061990.2.1                 | Solanesyl diphosphate synthase                | 0.66 | 0.06 | 0.47 | 0.03 | 5.25  | 22.05 |
| Solyc08g014000.2.1                 | Lipoxygenase (LoxA)                           | 1.41 | 0.02 | 0.38 | 0.03 | 77.50 | 60.14 |
| Solyc09g091470.2.1                 | 3-ketoacyl CoA thiolase 2                     | 0.36 | 0.03 | 0.51 | 0.04 | 30.25 | 60.27 |
| Solyc10g080900.1.1                 | 3-oxoacyl-reductase                           | 0.15 | 0.05 | 0.51 | 0.03 | 25.75 | 65.77 |
| Solyc11g006250.1.1                 | GDSL esterase/lipase (G1DEX3)                 | 0.80 | 0.23 | 2.79 | 0.41 | 9.50  | 31.77 |
| Solyc12g017460.1.1                 | GDSL esterase/lipase At1g28590                | 0.76 | 0.08 | 2.38 | 0.34 | 4.00  | 14.09 |
| Solyc12g056940.1.1                 | Acetyl-CoA carboxylase (ACC)                  | 0.38 | 0.07 | 0.72 | 0.04 | 32.00 | 18.89 |
| <b>Oxidation-reduction process</b> |                                               |      |      |      |      |       |       |
| Solyc01g067740.2.1                 | Superoxide dismutase (SODCC.1)                | 1.04 | 0.10 | 0.43 | 0.07 | 12.75 | 61.84 |
| Solyc01g073640.2.1                 | Uncharacterized oxidoreductase Mb1385 (yfe37) | 0.90 | 0.06 | 2.34 | 0.03 | 19.25 | 47.30 |
| Solyc01g103920.2.1                 | Ferredoxin I                                  | 0.90 | 0.04 | 0.48 | 0.08 | 2.50  | 48.21 |
| Solyc02g030170.2.1                 | FAD linked oxidase domain protein             | 2.18 | 0.56 | 0.84 | 0.06 | 15.75 | 29.40 |
| Solyc02g062500.2.1                 | 2-oxoglutarate-dependent dioxygenase          | 0.38 | 0.03 | 0.57 | 0.02 | 35.50 | 66.74 |
| Solyc02g079500.2.1                 | Peroxidase (TAP1)                             | 1.30 | 0.12 | 2.37 | 1.10 | 16.00 | 27.61 |
| Solyc02g086880.2.1                 | Formate dehydrogenase                         | 2.68 | 0.28 | 1.02 | 0.13 | 43.50 | 66.93 |
| Solyc02g087110.2.1                 | Alpha-dioxygenase                             | 0.24 | 0.05 | 0.23 | 0.02 | 13.50 | 26.82 |



|                    |                                                  |      |      |      |      |       |       |
|--------------------|--------------------------------------------------|------|------|------|------|-------|-------|
| Solyc03g111720.2.1 | Peptide methionine sulfoxide reductase msrA (E4) | 0.06 | 0.02 | 0.57 | 0.03 | 17.75 | 52.04 |
| Solyc03g111970.2.1 | Cytochrome P450 (CYP450)                         | 0.40 | 0.06 | 0.65 | 0.08 | 3.25  | 9.68  |
| Solyc03g120720.2.1 | Protein disulfide isomerase L-3b                 | 0.97 | 0.07 | 0.23 | 0.05 | 8.75  | 18.03 |
| Solyc03g121040.2.1 | Taurine catabolism dioxygenase TauD/TfdA family  | 0.38 | 0.06 | 0.44 | 0.05 | 5.75  | 25.93 |
| Solyc03g122350.2.1 | Cytochrome P450 (CYP450)                         | 0.32 | 0.08 | 0.67 | 0.06 | 6.00  | 25.42 |
| Solyc04g049450.2.1 | Protein disulfide isomerase L-2                  | 0.63 | 0.03 | 0.29 | 0.02 | 11.50 | 24.87 |
| Solyc04g071890.2.1 | Peroxidase 4                                     | 0.46 | 0.04 | 3.40 | 0.25 | 20.25 | 36.57 |
| Solyc04g080550.2.1 | Phenylcoumaran benzylic ether reductase          | 0.46 | 0.01 | 0.32 | 0.04 | 5.75  | 29.55 |
| Solyc05g005460.2.1 | Nucleoredoxin 2                                  | 0.33 | 0.07 | 1.82 | 0.26 | 7.25  | 17.81 |
| Solyc05g005480.2.1 | Oxidoreductase zinc-binding dehydrogenase (EO)   | 1.43 | 0.03 | 0.47 | 0.05 | 26.00 | 63.27 |
| Solyc05g005700.2.1 | Aldehyde dehydrogenase 1                         | 2.27 | 0.16 | 1.10 | 0.04 | 23.75 | 41.78 |
| Solyc05g008450.2.1 | Oxidoreductase FAD/NAD(P)-binding domain protein | 0.86 | 0.14 | 0.46 | 0.02 | 16.50 | 44.04 |
| Solyc05g054760.2.1 | Dehydroascorbate reductase                       | 2.45 | 0.22 | 1.06 | 0.07 | 21.75 | 79.29 |
| Solyc06g005940.2.1 | Protein disulfide isomerase                      | 1.16 | 0.08 | 0.39 | 0.03 | 31.75 | 46.40 |
| Solyc06g048410.2.1 | Superoxide dismutase                             | 2.00 | 0.39 | 0.64 | 0.07 | 6.00  | 25.30 |
| Solyc06g059740.2.1 | Alcohol dehydrogenase 2 (ADH2)                   | 0.78 | 0.03 | 0.26 | 0.05 | 38.25 | 45.64 |

|                    |                                                          |      |      |      |      |       |       |
|--------------------|----------------------------------------------------------|------|------|------|------|-------|-------|
| Solyc06g060290.2.1 | Protein disulfide isomerase                              | 0.94 | 0.07 | 0.25 | 0.01 | 24.00 | 44.06 |
| Solyc07g005390.2.1 | Aldehyde dehydrogenase                                   | 3.28 | 0.22 | 1.14 | 0.10 | 34.75 | 57.26 |
| Solyc07g043570.2.1 | Aldo/keto reductase family protein                       | 1.90 | 0.27 | 0.48 | 0.05 | 8.00  | 26.62 |
| Solyc07g047800.2.1 | Short-chain<br>dehydrogenase/reductase family<br>protein | 0.18 | 0.02 | 0.58 | 0.01 | 20.50 | 55.07 |
| Solyc08g005630.2.1 | Glucose-methanol-choline<br>oxidoreductase               | 0.18 | 0.04 | 0.27 | 0.01 | 24.25 | 30.65 |
| Solyc09g066150.1.1 | Cytochrome P450 (CYP450)                                 | 0.19 | 0.02 | 0.62 | 0.03 | 16.25 | 34.46 |
| Solyc10g080840.1.1 | Cytochrome P450 (CYP450)                                 | 0.22 | 0.04 | 0.59 | 0.04 | 8.50  | 17.83 |
| Solyc10g081440.1.1 | NADH cytochrome b5 reductase                             | 0.48 | 0.05 | 0.82 | 0.04 | 7.25  | 24.19 |
| Solyc10g083650.1.1 | Peroxiredoxin ahpC/TSA family<br>(AhpC)                  | 0.53 | 0.05 | 0.32 | 0.03 | 12.75 | 55.05 |
| Solyc10g087010.1.1 | cytochrome P450 (CYP450)                                 | 3.77 | 2.77 | 0.91 | 0.13 | 1.75  | 6.86  |
| Solyc11g010960.1.1 | Alcohol dehydrogenase                                    | 1.24 | 0.05 | 6.99 | 2.26 | 10.00 | 25.70 |
| Solyc11g066390.1.1 | Superoxide dismutase (SODCP.2)                           | 1.06 | 0.07 | 0.44 | 0.06 | 12.25 | 57.15 |
| Solyc11g069400.1.1 | Protein disulfide isomerase L-2                          | 1.12 | 0.09 | 0.27 | 0.06 | 11.25 | 23.02 |
| Solyc11g069800.1.1 | cytochrome P450 (CYP450)                                 | 0.49 | 0.03 | 0.63 | 0.06 | 20.25 | 42.89 |
| Solyc11g069860.1.1 | Glutaredoxin                                             | 0.83 | 0.07 | 0.35 | 0.09 | 2.00  | 26.05 |
| Solyc12g010950.1.1 | Alcohol dehydrogenase superfamily,<br>zinc-containing    | 0.38 | 0.02 | 1.57 | 0.17 | 5.00  | 22.40 |

|                       |                                                         |      |      |      |      |       |       |
|-----------------------|---------------------------------------------------------|------|------|------|------|-------|-------|
| Solyc12g013690.1.1    | Aromatic-ring hydroxylase-like                          | 0.28 | 0.07 | 0.51 | 0.05 | 11.00 | 34.03 |
| Solyc12g094620.1.1    | Catalase (CAT1)                                         | 0.39 | 0.02 | 1.01 | 0.08 | 55.25 | 68.39 |
| <b>Photosynthesis</b> |                                                         |      |      |      |      |       |       |
| Solyc01g007330.2.1    | Ribulose biphosphate carboxylase large chain (rbcL)     | 0.73 | 0.03 | 0.35 | 0.09 | 69.50 | 60.27 |
| Solyc01g007500.2.1    | Photosystem II CP47 chlorophyll apoprotein (PsbB)       | 1.49 | 0.25 | 2.99 | 0.63 | 18.75 | 26.67 |
| Solyc01g105030.2.1    | Chlorophyll a-b binding protein, chloroplastic (CAP10A) | 1.28 | 0.03 | 4.17 | 0.18 | 6.00  | 24.80 |
| Solyc01g106090.2.1    | Photosystem II oxygen evolving complex protein (PsbP)   | 1.08 | 0.05 | 2.83 | 0.72 | 5.00  | 19.78 |
| Solyc05g005490.2.1    | Carbonic anhydrase (CA1)                                | 0.24 | 0.04 | 0.54 | 0.03 | 25.00 | 65.67 |
| Solyc06g060340.2.1    | Chloroplast photosystem II-associated protein (PSBS)    | 1.05 | 0.01 | 0.38 | 0.02 | 10.00 | 23.91 |
| Solyc06g063370.2.1    | Chlorophyll a-b binding protein 1A, chloroplastic       | 1.54 | 0.14 | 4.27 | 0.80 | 12.00 | 44.23 |
| Solyc08g013670.2.1    | Photosystem I reaction centre subunit N                 | 1.67 | 0.08 | 2.76 | 0.37 | 6.50  | 37.12 |
| Solyc09g014520.2.1    | Chlorophyll a-b binding protein 6A, chloroplastic       | 1.48 | 0.07 | 4.05 | 0.48 | 11.75 | 39.82 |

|                                  |                                                  |      |      |      |      |       |       |
|----------------------------------|--------------------------------------------------|------|------|------|------|-------|-------|
| Solyc09g015290.1.1               | Photosystem I P700 chlorophyll a apoprotein A1   | 1.09 | 0.10 | 2.11 | 0.22 | 1.00  | 11.25 |
| Solyc09g063130.2.1               | Photosystem I reaction center subunit IV A       | 0.87 | 0.04 | 2.05 | 0.28 | 7.00  | 46.78 |
| Solyc10g007690.2.1               | Chlorophyll a-b binding protein 8, chloroplastic | 1.44 | 0.04 | 2.62 | 0.36 | 4.75  | 25.18 |
| <b>Protein metabolic process</b> |                                                  |      |      |      |      |       |       |
| Solyc01g028810.2.1               | Chaperonin Cpn60                                 | 0.65 | 0.05 | 0.40 | 0.04 | 63.75 | 64.98 |
| Solyc01g079610.2.1               | Heat shock protein DnaJ                          | 0.84 | 0.08 | 2.35 | 0.72 | 4.50  | 17.83 |
| Solyc01g080410.2.1               | Peptide methionine sulfoxide reductase msrB      | 0.96 | 0.04 | 0.43 | 0.04 | 0.75  | 28.33 |
| Solyc01g088610.2.1               | Chaperonin Cpn10                                 | 0.93 | 0.05 | 0.42 | 0.02 | 3.00  | 37.40 |
| Solyc01g100380.2.1               | Calreticulin 2 calcium-binding protein           | 0.93 | 0.07 | 0.38 | 0.05 | 13.25 | 36.63 |
| Solyc01g103450.2.1               | Chaperone DnaK                                   | 0.74 | 0.10 | 0.46 | 0.03 | 40.75 | 56.15 |
| Solyc02g077670.2.1               | Chaperone protein dnaJ 2                         | 0.41 | 0.05 | 0.32 | 0.12 | 6.25  | 26.60 |
| Solyc02g088610.2.1               | ATP-dependent chaperone ClpB                     | 0.54 | 0.05 | 0.31 | 0.04 | 65.50 | 56.61 |
| Solyc03g082890.2.1               | Pentapeptide repeat protein                      | 1.01 | 0.08 | 2.13 | 0.25 | 5.50  | 29.51 |
| Solyc03g098780.1.1               | Kunitz-type protease inhibitor (KTI3)            | 2.55 | 0.65 | 1.86 | 0.33 | 1.00  | 5.43  |

|                    |                                             |      |      |      |      |       |       |
|--------------------|---------------------------------------------|------|------|------|------|-------|-------|
| Solyc03g118040.2.1 | Calcium-binding protein Calnexin (CNX61.0)  | 0.79 | 0.04 | 2.18 | 0.25 | 27.50 | 45.96 |
| Solyc04g079470.2.1 | Serpin (Serine protease inhibitor)          | 0.97 | 0.11 | 2.37 | 0.19 | 0.50  | 5.83  |
| Solyc05g010670.2.1 | Chaperone protein htpG (HSP90)              | 0.54 | 0.09 | 0.39 | 0.01 | 42.25 | 52.00 |
| Solyc05g056230.2.1 | Calreticulin 2 calcium-binding protein      | 1.02 | 0.09 | 0.21 | 0.01 | 15.75 | 36.43 |
| Solyc06g083190.2.1 | Peptidyl-prolyl cis-trans isomerase         | 0.57 | 0.08 | 0.40 | 0.02 | 39.25 | 59.10 |
| Solyc07g042250.2.1 | Chaperonin Cpn10 (CPN21)                    | 0.57 | 0.09 | 0.43 | 0.03 | 17.25 | 66.11 |
| Solyc07g062060.2.1 | Peptide methionine sulfoxide reductase msrB | 0.75 | 0.11 | 0.38 | 0.04 | 5.75  | 39.36 |
| Solyc09g057670.2.1 | Peptidyl-prolyl cis-trans isomerase         | 0.57 | 0.03 | 0.09 | 0.02 | 6.25  | 48.15 |
| Solyc10g081240.1.1 | GrpE nucleotide exchange factor             | 0.69 | 0.25 | 0.24 | 0.05 | 15.00 | 41.05 |
| Solyc11g020040.1.1 | Chaperone DnaK (HSP70)                      | 0.84 | 0.09 | 0.27 | 0.02 | 52.00 | 56.39 |
| Solyc11g021060.1.1 | Proteinase inhibitor (ARPI)                 | 1.23 | 0.21 | 2.66 | 1.04 | 1.25  | 8.72  |
| Solyc11g022590.1.1 | Kunitz trypsin inhibitor 4 (Fragment)       | 4.63 | 0.93 | 4.65 | 0.78 | 7.25  | 41.22 |
| Solyc11g069790.1.1 | Chaperonin Cpn60                            | 0.69 | 0.09 | 0.34 | 0.02 | 42.50 | 60.80 |
| Solyc11g071830.1.1 | Chaperone protein DnaJ                      | 0.76 | 0.17 | 0.34 | 0.08 | 3.75  | 18.12 |
| Solyc12g056850.1.1 | Co-chaperone protein DnaJ                   | 0.86 | 0.09 | 0.45 | 0.09 | 1.00  | 6.14  |

---

## Proteolysis

|                    |                                         |      |      |      |      |       |       |
|--------------------|-----------------------------------------|------|------|------|------|-------|-------|
| Solyc01g068390.2.1 | Zinc finger family protein              | 0.69 | 0.44 | 3.28 | 3.30 | 1.50  | 3.10  |
| Solyc01g087850.2.1 | Subtilisin-like protease                | 0.32 | 0.04 | 0.64 | 0.08 | 10.75 | 16.03 |
| Solyc01g108490.2.1 | Serine carboxypeptidase 1               | 1.81 | 0.37 | 2.84 | 1.30 | 8.50  | 18.46 |
| Solyc01g111400.2.1 | Subtilisin-like protease                | 1.34 | 0.25 | 2.25 | 0.27 | 7.50  | 14.02 |
| Solyc02g068380.2.1 | N-carbamoyl-L-amino-acid amidohydrolase | 0.71 | 0.12 | 0.41 | 0.08 | 4.25  | 12.02 |
| Solyc03g119690.1.1 | Aspartic proteinase nepenthesin-1       | 2.21 | 0.14 | 1.89 | 0.36 | 4.00  | 10.86 |
| Solyc03g121270.2.1 | IAA-amino acid hydrolase                | 1.19 | 0.09 | 0.32 | 0.05 | 13.75 | 35.11 |
| Solyc04g007120.2.1 | UV excision repair protein RAD23        | 0.40 | 0.13 | 0.73 | 0.11 | 5.00  | 20.48 |
| Solyc04g015340.2.1 | Serine carboxypeptidase K10B2.2         | 0.62 | 0.04 | 0.49 | 0.05 | 5.50  | 17.27 |
| Solyc04g077650.2.1 | Serine carboxypeptidase 1               | 0.34 | 0.05 | 0.49 | 0.08 | 7.25  | 17.05 |
| Solyc04g077670.2.1 | Serine carboxypeptidase 1               | 1.40 | 0.34 | 2.58 | 0.35 | 2.25  | 8.64  |
| Solyc06g073060.2.1 | laa-amino acid hydrolase 6              | 0.96 | 0.02 | 0.30 | 0.05 | 11.50 | 31.63 |
| Solyc07g008900.2.1 | Subtilisin-like serine protease         | 2.82 | 0.73 | 1.48 | 0.34 | 3.25  | 6.43  |
| Solyc08g079870.1.1 | Subtilisin-like protease (P69B)         | 0.11 | 0.03 | 4.44 | 0.91 | 18.00 | 30.54 |
| Solyc08g082820.2.1 | Heat shock protein 70 (BiP/grp78)       | 0.94 | 0.05 | 0.41 | 0.01 | 17.50 | 51.61 |

### Regulation of gene expression

|                    |                                                            |      |      |      |      |      |       |
|--------------------|------------------------------------------------------------|------|------|------|------|------|-------|
| Solyc01g100760.2.1 | Susceptibility homeodomain transcription factor (Fragment) | 0.10 | 0.02 | 0.87 | 0.11 | 8.25 | 47.56 |
|--------------------|------------------------------------------------------------|------|------|------|------|------|-------|

|                    |                                                            |      |      |      |      |       |       |
|--------------------|------------------------------------------------------------|------|------|------|------|-------|-------|
| Solyc01g111280.2.1 | Cold shock protein-1                                       | 3.61 | 1.74 | 2.07 | 0.84 | 4.00  | 43.42 |
| Solyc01g112060.2.1 | NmrA family protein                                        | 1.47 | 0.15 | 2.09 | 0.04 | 5.50  | 17.75 |
| Solyc02g068200.1.1 | TCP family transcription factor                            | 0.43 | 0.12 | 0.56 | 0.07 | 2.00  | 8.32  |
| Solyc02g070500.1.1 | Susceptibility homeodomain transcription factor (Fragment) | 0.48 | 0.15 | 0.97 | 0.17 | 7.50  | 44.22 |
| Solyc07g006560.2.1 | Hypersensitive response assisting protein                  | 3.10 | 1.17 | 5.36 | 0.77 | 6.75  | 50.00 |
| Solyc07g006570.2.1 | S8-RNase (Fragment)                                        | 2.13 | 0.65 | 6.35 | 0.52 | 7.75  | 29.83 |
| Solyc07g049150.2.1 | Ribonuclease III family protein                            | 0.41 | 0.20 | 8.56 | 3.94 | 3.00  | 12.78 |
| Solyc09g092380.2.1 | Adenosylhomocysteinase (SAHH)                              | 0.47 | 0.12 | 0.47 | 0.02 | 60.75 | 63.82 |
| Solyc10g051390.1.1 | RNA-binding glycine-rich protein-1b                        | 0.81 | 0.06 | 4.79 | 3.03 | 6.75  | 62.29 |

### Regulation of translation

|                    |                                             |      |      |      |      |       |       |
|--------------------|---------------------------------------------|------|------|------|------|-------|-------|
| Solyc01g095900.2.1 | Protein TIF31 homolog                       | 0.48 | 0.13 | 0.81 | 0.04 | 5.25  | 6.47  |
| Solyc02g081810.2.1 | tRNA pseudouridine synthase B               | 1.13 | 0.27 | 2.46 | 1.03 | 6.50  | 13.53 |
| Solyc03g117330.2.1 | Prolyl-tRNA synthetase                      | 1.01 | 0.37 | 2.40 | 1.72 | 1.25  | 21.97 |
| Solyc07g006030.2.1 | Protein TIF31 homolog                       | 0.47 | 0.10 | 0.69 | 0.10 | 10.00 | 7.47  |
| Solyc07g018360.2.1 | Elongation factor Ts                        | 0.71 | 0.09 | 0.46 | 0.19 | 25.50 | 28.77 |
| Solyc11g069700.1.1 | Protein biosynthesis elongation factor EF1A | 0.14 | 0.03 | 2.46 | 0.31 | 3.00  | 60.07 |

---

**Response to stimulus**

|                    |                                                        |       |       |      |      |       |       |
|--------------------|--------------------------------------------------------|-------|-------|------|------|-------|-------|
| Solyc01g100370.2.1 | Universal stress protein                               | 0.88  | 0.13  | 0.21 | 0.02 | 10.75 | 47.89 |
| Solyc01g102960.2.1 | class IV heat shock protein Hsp20                      | 0.65  | 0.11  | 0.04 | 0.01 | 15.75 | 57.41 |
| Solyc02g084850.2.1 | Dehydrin                                               | 21.93 | 10.65 | 0.52 | 0.30 | 2.00  | 22.31 |
| Solyc03g007890.2.1 | Heat shock protein Hsp90                               | 0.61  | 0.22  | 0.29 | 0.03 | 61.00 | 63.81 |
| Solyc03g082420.2.1 | Heat shock protein Hsp20                               | 1.47  | 1.18  | 0.09 | 0.00 | 23.75 | 54.47 |
| Solyc03g113930.1.1 | class IV heat shock protein Hsp20                      | 0.89  | 0.38  | 0.04 | 0.01 | 6.75  | 44.81 |
| Solyc03g116390.2.1 | Late embryogenesis abundant protein (LEAP)             | 8.13  | 2.26  | 0.30 | 0.10 | 6.00  | 42.25 |
| Solyc03g117630.1.1 | Heat shock protein 70                                  | 0.84  | 0.59  | 0.17 | 0.01 | 17.00 | 55.66 |
| Solyc03g123540.2.1 | class II heat shock protein Hsp20                      | 1.29  | 0.38  | 0.45 | 0.05 | 4.50  | 34.20 |
| Solyc04g014480.2.1 | class I heat shock protein 3 Hsp20                     | 1.02  | 0.27  | 0.32 | 0.01 | 10.00 | 59.48 |
| Solyc04g014600.2.1 | Universal stress protein family protein                | 1.64  | 0.37  | 0.39 | 0.03 | 14.00 | 55.86 |
| Solyc04g071620.2.1 | ABA/WDS induced protein, ASR4 (Fragment)               | 3.10  | 0.54  | 1.77 | 0.37 | 21.50 | 65.41 |
| Solyc05g014280.2.1 | Heat shock protein Hsp20 (VIS1)                        | 0.19  | 0.05  | 0.17 | 0.00 | 18.50 | 51.81 |
| Solyc05g015390.2.1 | Rubber elongation factor-like stress related protein 1 | 0.51  | 0.17  | 0.36 | 0.12 | 8.00  | 38.48 |

---



|                    |                                                   |      |      |      |      |       |       |
|--------------------|---------------------------------------------------|------|------|------|------|-------|-------|
| Solyc05g056580.2.1 | Dehydration-responsive family protein             | 1.27 | 0.12 | 2.37 | 0.32 | 7.50  | 12.79 |
| Solyc06g009050.2.1 | Universal stress protein                          | 0.79 | 0.16 | 0.40 | 0.09 | 7.00  | 18.48 |
| Solyc06g036290.2.1 | Heat shock protein 90 (Fragment)                  | 0.92 | 0.09 | 0.40 | 0.01 | 12.50 | 62.03 |
| Solyc06g076520.1.1 | class I heat shock protein Hsp20                  | 2.07 | 0.25 | 0.35 | 0.02 | 26.75 | 77.92 |
| Solyc06g076560.1.1 | class I heat shock protein Hsp20 (HSP17.6)        | 1.79 | 0.97 | 0.19 | 0.02 | 6.75  | 77.92 |
| Solyc06g076570.1.1 | class I heat shock protein Hsp20                  | 0.83 | 0.15 | 0.43 | 0.15 | 12.50 | 75.16 |
| Solyc07g043560.2.1 | Heat shock protein 4 (HSP70)                      | 1.04 | 0.06 | 0.33 | 0.07 | 15.75 | 23.54 |
| Solyc07g064160.2.1 | Thiamine biosynthesis Thi4 protein                | 2.17 | 0.09 | 0.98 | 0.19 | 16.50 | 37.85 |
| Solyc08g016670.2.1 | Calcyclin-binding protein (CACYPB)                | 1.01 | 0.08 | 0.36 | 0.03 | 10.50 | 55.25 |
| Solyc08g062340.2.1 | Class II small heat shock protein Le-HSP17.6      | 1.14 | 0.23 | 0.45 | 0.02 | 11.00 | 59.20 |
| Solyc08g062450.1.1 | class II heat shock protein Hsp20                 | 2.53 | 0.22 | 0.38 | 0.03 | 30.50 | 61.08 |
| Solyc08g075870.2.1 | Dehydration-responsive family protein-like        | 2.01 | 0.40 | 4.16 | 0.30 | 13.75 | 25.75 |
| Solyc08g076480.2.1 | Plastid lipid-associated protein 3, chloroplastic | 2.76 | 0.60 | 0.58 | 0.01 | 17.00 | 53.71 |
| Solyc08g078510.2.1 | GRAM-containing/ABA-responsive protein (Fragment) | 0.35 | 0.05 | 0.76 | 0.03 | 6.25  | 30.37 |

|                            |                                                        |      |      |      |      |       |       |
|----------------------------|--------------------------------------------------------|------|------|------|------|-------|-------|
| Solyc08g078700.2.1         | Heat shock protein 22 (MTSHP)                          | 1.42 | 0.32 | 0.36 | 0.02 | 17.50 | 54.05 |
| Solyc09g015000.2.1         | class I heat shock protein Hsp20                       | 2.59 | 2.35 | 0.29 | 0.05 | 10.25 | 59.89 |
| Solyc09g015020.1.1         | class I heat shock protein 3 Hsp20                     | 2.03 | 0.62 | 0.28 | 0.01 | 13.00 | 48.38 |
| Solyc09g075950.1.1         | Heat shock protein 1                                   | 0.98 | 0.30 | 0.36 | 0.00 | 20.75 | 41.49 |
| Solyc11g020330.1.1         | class IV heat shock protein Hsp20 (er-sHSP)            | 1.48 | 0.40 | 0.04 | 0.00 | 11.75 | 49.47 |
| Solyc11g066100.1.1         | Heat shock protein 70                                  | 1.02 | 0.14 | 0.35 | 0.05 | 95.25 | 75.65 |
| Solyc12g013700.1.1         | Aluminum-induced protein-like protein                  | 0.20 | 0.03 | 0.94 | 0.03 | 8.25  | 35.04 |
| Solyc12g042830.1.1         | class I heat shock protein, HSP20-like chaperone       | 0.50 | 0.13 | 0.33 | 0.03 | 1.75  | 24.05 |
| <b>Signal transduction</b> |                                                        |      |      |      |      |       |       |
| Solyc01g008850.2.1         | CBL-interacting protein kinase 18                      | 0.45 | 0.04 | 1.06 | 0.11 | 7.75  | 21.80 |
| Solyc01g097770.2.1         | Serine/threonine protein kinase                        | 2.38 | 0.11 | 1.97 | 0.43 | 10.25 | 11.62 |
| Solyc05g055860.2.1         | Serine/threonine-protein kinase                        | 4.42 | 1.08 | 1.31 | 0.29 | 0.50  | 2.47  |
| Solyc07g007140.2.1         | Serine/threonine-protein kinase B-raf                  | 0.66 | 0.37 | 0.44 | 0.32 | 1.00  | 2.21  |
| Solyc07g056150.2.1         | Ras-related protein Rab-2-A                            | 1.65 | 0.43 | 2.03 | 0.76 | 1.00  | 56.61 |
| Solyc10g052880.1.1         | LRR receptor-like serine/threonine-protein kinase, RLP | 0.40 | 0.05 | 1.06 | 0.03 | 7.00  | 18.36 |

|                    |                                                                  |      |      |      |      |       |       |
|--------------------|------------------------------------------------------------------|------|------|------|------|-------|-------|
| Solyc11g056680.1.1 | LRR receptor-like serine/threonine-protein kinase, RLP           | 2.77 | 0.17 | 0.70 | 0.06 | 23.25 | 44.78 |
| <b>Transport</b>   |                                                                  |      |      |      |      |       |       |
| Solyc01g111040.2.1 | EF-Hand containing protein-like                                  | 0.74 | 0.03 | 0.40 | 0.01 | 21.50 | 48.87 |
| Solyc02g032930.2.1 | B-cell receptor-associated protein 31-like containing protein    | 0.46 | 0.15 | 0.70 | 0.08 | 10.75 | 36.15 |
| Solyc03g082660.2.1 | Major facilitator superfamily domain containing protein 5 (MFSD) | 1.04 | 0.06 | 2.93 | 0.37 | 3.25  | 7.63  |
| Solyc03g117300.2.1 | Nodulin-like protein                                             | 1.07 | 0.10 | 2.04 | 0.40 | 1.50  | 3.55  |
| Solyc03g120980.2.1 | ATP-binding cassette transporter                                 | 0.42 | 0.06 | 1.05 | 0.16 | 10.25 | 9.05  |
| Solyc04g014570.2.1 | Transmembrane 9 superfamily protein member 1                     | 1.34 | 0.09 | 2.09 | 0.62 | 2.25  | 11.91 |
| Solyc05g054210.2.1 | Proline-rich protein                                             | 2.34 | 0.31 | 1.04 | 0.11 | 2.50  | 11.97 |
| Solyc06g076750.2.1 | Peptide transporter                                              | 1.61 | 0.14 | 2.20 | 0.07 | 4.25  | 8.63  |
| Solyc07g005210.2.1 | Outer membrane lipoprotein blc (TIL)                             | 1.39 | 0.48 | 0.41 | 0.02 | 4.25  | 31.08 |
| Solyc07g052470.2.1 | Syntaxin                                                         | 0.36 | 0.09 | 0.64 | 0.05 | 6.75  | 23.28 |
| Solyc08g074480.1.1 | Plant lipid transfer protein and hydrophobic protein             | 0.39 | 0.10 | 0.81 | 0.06 | 1.00  | 8.59  |
| Solyc08g081910.2.1 | V-type proton ATPase subunit E                                   | 3.30 | 0.83 | 0.95 | 0.12 | 24.25 | 54.76 |

|                    |                                                   |       |      |      |      |       |       |
|--------------------|---------------------------------------------------|-------|------|------|------|-------|-------|
| Solyc09g015650.2.1 | Non-green plastid inner envelope membrane protein | 20.99 | 7.88 | 1.44 | 0.28 | 5.50  | 18.08 |
| Solyc10g075090.1.1 | Non-specific lipid-transfer protein (LE16)        | 6.19  | 5.40 | 0.99 | 0.20 | 4.25  | 45.04 |
| Solyc10g075110.1.1 | Non-specific lipid-transfer protein (TSW12)       | 5.02  | 1.16 | 0.50 | 0.34 | 1.25  | 37.07 |
| Solyc11g051160.1.1 | Phosphatidylinositol transfer protein SFH5        | 0.33  | 0.05 | 0.63 | 0.04 | 19.75 | 39.22 |
| Solyc12g010320.1.1 | Lipocalin                                         | 0.37  | 0.06 | 0.59 | 0.05 | 14.50 | 43.92 |
| Solyc12g055800.1.1 | V-type ATP synthase alpha chain                   | 2.35  | 0.48 | 1.45 | 0.08 | 97.50 | 76.48 |
| <b>Unknown</b>     |                                                   |       |      |      |      |       |       |
| Solyc02g086460.2.1 | Unknown Protein                                   | 0.19  | 0.05 | 1.57 | 0.21 | 83.00 | 31.26 |
| Solyc04g080540.2.1 | ST225                                             | 0.68  | 0.14 | 0.28 | 0.02 | 6.00  | 46.63 |
| Solyc04g081330.2.1 | Chromosome 11 contig 1 DNA sequence. (Fragment)   | 0.89  | 0.04 | 0.34 | 0.02 | 3.00  | 16.55 |
| Solyc06g063240.2.1 | Os03g0169000 protein                              | 1.52  | 0.36 | 4.11 | 0.26 | 13.75 | 35.90 |
| Solyc06g066030.2.1 | Os02g0200800 protein (Fragment)                   | 1.12  | 0.14 | 2.29 | 1.26 | 0.50  | 3.47  |
| Solyc09g008970.1.1 | Unknown Protein                                   | 0.36  | 0.15 | 0.26 | 0.03 | 5.75  | 44.30 |

<sup>a</sup>Accession number from the International Tomato Annotation Group release version 2.4.

<sup>b</sup>The average fold change of protein expression levels in *vif* versus wild-type at 38 days post-anthesis (dpa) from three independent biological replicates. The meaningful cut-off was fixed at 2 fold corresponding to the iTRAQ ratio of >2.0 for up-regulation and <0.5 for down-regulation.

<sup>c</sup>The average fold change of protein expression levels in *vif* versus wild-type at 41 dpa from three independent biological replicates. The meaningful cut-off was fixed at 2 fold corresponding to the iTRAQ ratio of >2.0 for up-regulation and <0.5 for down-regulation.

<sup>d</sup>The average number of unique peptides identified (95% confidence) from three independent biological replicates.

<sup>e</sup>The average sequence coverage of amino acid for the identified proteins from three independent biological replicates.

**Supplemental Table S7.** Primers for qRT-PCR analysis of selected genes identified in *iTRAQ*

| Accession Number | Primer    | Sequence                   |
|------------------|-----------|----------------------------|
| Solyc03g123760   | qPDS-F    | TTGACAGAAAACCTGAAGAACACATA |
|                  | qPDS-R    | TGCAAAAACCAATTCCAACATAGAC  |
| Solyc10g081650   | qCRTISO-F | TCGTGTTGCAGCTGACTTAGGG     |
|                  | qCRTISO-R | AGAAGAGCACTGTCCAGCACATC    |
| Solyc07g049530   | qACO1-F   | ACGGGAAGTACAAGAGTGTGCTG    |
|                  | qACO1-R   | ACATTCGTGTCCCGTCTGTTTGTG   |
| Solyc03g111720   | qE4-F     | TGCCCGTATTCCAATCTCCT       |
|                  | qE4-R     | CTGCTTACAACCTCTGCCCC       |
| Solyc09g089580   | qE8-F     | GATGTTCCCTCTACACCCGGTTCT   |
|                  | qE8-R     | TTCACTGTGGTTGCGCGATATTTT   |
| Solyc01g101060   | qSAM1-F   | AGGCAGGCTGCAAAGAGTATCG     |
|                  | qSAM1-R   | GGCACACCGATGGCATAAGATAACC  |
| Solyc09g008280   | qSAM3-F   | ACTTGCTCGCCGCTGTATTGTG     |
|                  | qSAM3-R   | ACGGAAAGTGGTTCAGCCACAC     |
| Solyc01g006540   | qLOXC-F   | CTTTCCAAATAGGCCAACAACTGC   |
|                  | qLOXC-R   | CCATTCCCTCAGCTGTTGGATCCTC  |
| Solyc09g007910   | qPAL-F    | TGTTGGACCTAATGGCGAGAAGC    |
|                  | qPAL-R    | GTAACACCAGCCACATGAAACGC    |
| Solyc03g083910   | qVI-F     | TCCTTCCCTTTGCAAGACTTGT     |
|                  | qVI-R     | TCTCCCTCTTCCCTTTCTTGATG    |
| Solyc10g080210   | qLePG-F   | TGGACAAGTATGGTGGCCAAGTTC   |
|                  | qLePG-R   | TCCAGAAGGTTAAGGCCGTTGG     |
| Solyc01g008710   | qMAN4-F   | TTTGGCAAGTATTGGGCCAAGG     |
|                  | qMAN4-R   | CTAGAAGTTGATGGGCTCTCTTGC   |
| Solyc07g064180   | qPME2.1-F | TTCCACTCTGCCACTCTTGCTG     |
|                  | qPME2.1-R | AGCTTGGTGTTTAGCTGGTCCTG    |

---

|                |               |                          |
|----------------|---------------|--------------------------|
| Solyc01g104950 | qXYLOSIDASE-F | GATATCACAATCCAGGTGGAAGGC |
|                | qXYLOSIDASE-R | ACAGTTGGACCTTTGTAGAACCTG |
| Solyc09g010860 | qEXPA4-F      | TTATACCGGCGGACCATGGCAAAC |
|                | qEXPA4-R      | AGCTCCACCCATAGTTCCAGATGC |

---
